28 **Abstract**

29 Ivermectin is a widely used antiparasitic drug and shows promising anticancer activity in various  
30 cancer types. Although multiple signaling pathways modulated by ivermectin have been  
31 identified, few studies have focused on the exact target of ivermectin. Herein, we report the  
32 pharmacological effects and direct targets of ivermectin in prostate cancer (PCa). Ivermectin  
33 caused G0/G1 arrest, induced cell apoptosis, DNA damage, and decreased androgen receptor  
34 (AR) signaling in PCa cells. Using integrated omics profiling, including RNA-seq and thermal  
35 proteome profiling, we found that the forkhead box protein A1 (FOXA1) and non-homologous  
36 end joining (NHEJ) repair executor Ku70/Ku80 were the direct targets of ivermectin. The  
37 binding of ivermectin and FOXA1 reduced the chromatin accessibility of AR and the G0/G1 cell  
38 cycle regulator E2F1, leading to cell proliferation inhibition. The binding of ivermectin and  
39 Ku70/Ku80 impaired the NHEJ repair ability. Cooperating with the downregulation of  
40 homologous recombination repair after AR inhibition, ivermectin triggered synthetic lethality.  
41 Our findings demonstrate the anticancer effect of ivermectin in prostate cancer, indicating that its  
42 use may be a new therapeutic approach for PCa.

43

44 **Keywords:** Ivermectin, Prostate cancer, FOXA1, Ku70/Ku80

## 45 **Introduction**

46 Prostate cancer is the most frequently diagnosed cancer among men and ranks as the second  
47 leading cause of cancer-related deaths in the United States of America, with more than 240,000  
48 diagnoses and over 34,000 deaths annually(Siegel *et al*, 2021). With surgical resection, in  
49 combination with androgen deprivation treatment (ADT) when necessary, the 5-year survival  
50 rate of early-stage prostate cancer is 98%. However, once the disease has progressed to  
51 castration-resistant prostate cancer (CRPC), the survival duration is only 1–2 years on  
52 average(Halabi *et al*, 2016). Due to androgen receptor (AR) overexpression, mutation, and splice  
53 variants, AR can be re-activated, resulting in resistance to current anti-androgen  
54 drugs(Carceles-Cordon *et al*, 2020). Genetic alterations of AR have been reported in up to 57.78%  
55 of advanced prostate cancer cases(Abida *et al*, 2019). Despite several strategies that have been  
56 proposed to improve this situation, the prognosis for patients with CRPC remains poor(Davis *et*  
57 *al*, 2019; Rathkopf *et al*, 2014), thereby highlighting the need to develop new therapeutic  
58 agents/approaches.

59

60 Drug repositioning is a highly studied alternative strategy for the discovery and development of  
61 anticancer drugs. This strategy identifies new indications for existing pharmacological  
62 compounds. Ivermectin is a macrolide antiparasitic drug with a 16-membered ring derived from  
63 avermectin(Campbell *et al*, 1983), which was approved by the Food and Drug Administration  
64 (FDA) for the treatment of onchocerciasis in humans in 1978(Laing *et al*, 2017). To date,  
65 ivermectin has been used by millions of people worldwide and exhibits a wide margin of clinical  
66 safety(Juarez *et al*, 2018a). Recently, several studies have explored the potential of ivermectin as  
67 a new cancer treatment(Crump, 2017; Juarez *et al*, 2018b; Tang *et al*, 2020). In breast cancer,  
68 ivermectin decreases p21-activated kinase 1 (PAK1) expression by promoting its degradation  
69 and inducing cell autophagy(Dou *et al*, 2016). In ovarian cancer, ivermectin can block the cell  
70 cycle and induce cell apoptosis through a Karyopherin- $\beta$ 1 (KPNB1) related mechanism(Kodama

71 *et al*, 2017). In leukemia, ivermectin preferentially kills leukemia cells at low concentrations by  
72 increasing the influx of chloride ions into cells, which trigger plasma membrane  
73 hyperpolarization and reactive oxygen species (ROS) production(Sharmeen *et al*, 2010). These  
74 results not only confirm the promising effect of ivermectin, but also reveal its safety for tumor  
75 suppression through the *in vivo* analysis. However, the detailed mechanism and direct target of  
76 ivermectin underlying ivermectin-mediated tumor suppression remain to be further elucidated.

77  
78 Here, we showed that ivermectin suppresses prostate cancer progression efficiently both *in vitro*  
79 and *in vivo*. We applied integrated profiling including RNA-seq and Thermal proteome, that  
80 found pioneer factor Forkhead Box Protein A1 (FOXA1) and Non-homologous End Joining  
81 (NHEJ) repair executor Ku70/Ku80 was the direct target of Ivermectin in prostate cancer.  
82 Ivermectin binds to these two proteins and blocks their biological function, which results in  
83 blockade of AR signaling transcription, E2F1 expression, and deficiency of DNA double-strand  
84 break (DSB) repair system, and thereby leads to G0/G1 arrest and trigger synthetic lethality. Our  
85 findings demonstrate both the effect and target of ivermectin in prostate cancer comprehensively  
86 and systemically, indicating that the use of ivermectin may constitute a new therapeutic approach  
87 for prostate cancer.

88

## 89 **Results**

### 90 **Ivermectin preferentially inhibited the viability of AR-positive prostate cancer cells**

91 To evaluate the effect of ivermectin in prostate cancer, we analyzed cell viability using MTT  
92 assays in AR-positive prostate cancer cell lines, LNCaP, C4-2, and 22RV1, AR-negative prostate  
93 cancer cell lines DU145 and PC-3, and non-tumorigenic human prostate primary stromal cells  
94 from patients with BPH(Chen *et al*, 2020). As is shown in **Fig. 1**, ivermectin markedly decreased  
95 the viability of all prostate cancer cells in a dose-dependent manner. Compared to tumor cells,  
96 the IC<sub>50</sub> of ivermectin in primary BPH stromal cells was much higher. Moreover, the effect of  
97 ivermectin was more dramatic in AR-positive prostate cancer cells than in AR-negative prostate

98 cancer cells. The IC<sub>50</sub> value was 2–3-fold lower in LNCaP and C4-2 cells than in DU145 and  
99 PC-3 cells. Meantime, the 22RV1 also showed dramatic responsive to ivermectin, suggesting  
100 that AR variants did not compromise the effect of ivermectin. Overall, our data revealed that  
101 ivermectin exerted a profound suppression of prostate cancer across different stages of the  
102 disease.

103

#### 104 **Ivermectin induced G<sub>0</sub>/G<sub>1</sub> arrest, apoptosis, and DNA damage in prostate cancer cells**

105 To further address ivermectin inhibition in prostate cancer cells, we explored the cell cycle  
106 distribution in response to ivermectin using flow cytometry. Consistent with the cell viability  
107 results, an ivermectin treatment of 48 h significantly arrested the cell cycle at the G<sub>0</sub>/G<sub>1</sub> phase in  
108 LNCaP, C4-2, and 22RV1 cells (**Fig. 2A**). Meanwhile, in the high-dose group (12 μM), we  
109 observed marked sub-G<sub>1</sub> peaks in C4-2 and 22RV1 cells, indicating that ivermectin could induce  
110 cell apoptosis (**Supplementary Fig. S1A**). Thus, we further explored the cell apoptosis rate after  
111 the ivermectin treatment using PI/annexin V staining. As expected, a high-dose ivermectin  
112 treatment for 48 h significantly induced apoptosis in LNCaP, C4-2, and 22RV1 cells (**Fig. 2B**).  
113 In line with this, an obvious upregulation of apoptosis markers, cleaved PARP and cleaved  
114 caspase-3, was detected in ivermectin-treated cells (**Fig. 2C**).

115

116 Increased DNA damage is one of the most common characteristics of anticancer drugs. We used  
117 comet assay to evaluate DNA damage levels after the ivermectin treatment. As is shown in **Fig.**  
118 **2D**, the comet assay moment increased dramatically in a dose-dependent manner in  
119 ivermectin-treated LNCaP, C4-2, and 22RV1 cells. Moreover, an elevated expression of the  
120 DNA damage marker γH2A.X was observed after the ivermectin treatment in all three cell lines  
121 (**Fig. 2D**). DNA damage activates DNA damage response proteins, leading to senescence and  
122 apoptosis(Lv *et al*, 2019). To understand better the cell fate after the ivermectin treatment, we  
123 also assayed cell senescence by β-galactosidase staining. An ivermectin treatment for 48 h had

124 no obvious effect on senescence in any of the tested prostate cancer cell lines, LNCaP, C4-2, and  
125 22RV1 (**Supplementary Fig. S1B**).

126

127 Based on the MTT assay, AR-negative PC-3 and DU145 cells were less sensitive to the  
128 ivermectin treatment. This observation was confirmed. An ivermectin treatment of 48 h had no  
129 significant effect on the cell cycle (**Supplementary Fig. S2A**), or apoptosis in DU145 cells  
130 (**Supplementary Fig. S2B**). The comet assay showed that a high-dose ivermectin treatment (12  
131  $\mu$ M) induced DNA damage, while low and median doses showed no effect (**Supplementary Fig.**  
132 **S2C**).

133

134 22RV1 xenograft model was used to determine effect of ivermectin on CRPC progression *in vivo*.  
135 Male mice bearing 22RV1 xenografts were castrated when tumors exceeded 300 mm<sup>3</sup> and  
136 randomized to vehicle or Ivermectin administered 10 mg/kg 3 times per week. Ivermectin  
137 significantly reduced 22RV1 tumor volume growth (**Fig. 2F**), lowering Ki-67 and PSA levels,  
138 and increasing the  $\gamma$ H2A.X level in tumor tissue (**Fig. 2G**).

139

140 Taken together, these results revealed that ivermectin could inhibit prostate cancer progression *in*  
141 *vitro* and *in vivo* by inducing G0/G1 arrest, apoptosis, and DNA damage.

142

### 143 **Ivermectin inhibited AR signaling in prostate cancer cells**

144 Cell viability and functional assays highlighted the close relationship between ivermectin and the  
145 AR signaling pathway. Western blotting showed that ivermectin markedly reduced AR and  
146 prostate-specific antigen (PSA) protein expression in LNCaP and C4-2 cells (**Fig. 3A**). Real-time  
147 quantitative reverse transcription PCR (RT-qPCR) analysis of AR downstream targets supported  
148 the inhibition of the AR signaling pathway by ivermectin (**Fig. 3B**). Moreover, in addition to  
149 full-length AR (AR-FL), ivermectin also reduced the expression of AR variants (ARVs) and AR

150 downstream targets in 22Rv1 cells (**Fig. 3C and 3D**). We tested the effect of ivermectin on  
151 ARVs in two other cell lines, LN95 and VCaP. Similar to its effect on 22RV1 cells, ivermectin  
152 decreased the expression of AR-FL and ARVs, and increased the expression of cleaved-PARP  
153 and  $\gamma$ H2A.X (**Fig. 3E**), indicating that ivermectin was a competent inhibitor of both AR-FL and  
154 ARVs. To further identify the inhibition role of ivermectin on AR signaling pathway, the R1881  
155 induction assay were subsequently performed. As is shown in **Fig. 3F**, ivermectin could compete  
156 the increased AR transcription activity after R1881 treatment. Interestingly, the R1881 treatment  
157 only partially reversed ivermectin-mediated cell apoptosis and DNA damage (**Fig. 3F**),  
158 suggesting that there was an AR-independent pathway for the effect of ivermectin in prostate  
159 cancer. This observation was supported by cell cycle analysis. Ivermectin arrested cells at the  
160 G0/G1 phase either with or without the R1881 treatment (**Fig. 3G**).

161  
162 In addition, we tested the combination of ivermectin and enzalutamide. The results showed that  
163 the IC50 of ivermectin in the combination treatment group was much lower than that in the  
164 ivermectin single drug group (**Fig. 3H**). Thus, the AR-dependent and AR-independent pathways  
165 would cooperate with each other for the tumor suppressive role of ivermectin. Together, our data  
166 indicate that ivermectin is a novel approach to suppress AR genomic alterations that drive  
167 resistance in CRPC.

168

### 169 **Ivermectin downregulated the expression of E2F targets**

170 To further explore the molecular association of ivermectin action in prostate cancer, we  
171 characterized the transcriptional profile altered by ivermectin by performing RNA-seq in C4-2  
172 and 22RV1 cells treated with two different doses of ivermectin in regular medium. Consistent  
173 with its AR inhibitory effect, ivermectin suppressed the expression of downstream targets of  
174 FL-AR (**Supplementary Fig. S3A and S3B**) and ARVs (**Supplementary Fig. S3C**). Further  
175 gene set enrichment analysis (GSEA)(Mootha *et al*, 2003) revealed the positive enrichment of

176 hallmark gene sets associated with apoptosis (e.g., apoptosis and the P53 pathway), and the  
177 suppression of gene sets related to proliferation, cell cycle, and DNA damage repair (e.g., E2F  
178 targets, the mitoticspindle, MYC targets V1/2, the G2M checkpoint, and DNA damage repair;  
179 **Fig. 4A**). After combining differentially expressed genes (DEGs) from these two cell lines, a  
180 total of 2,997 concordant DEGs were identified (**Fig. 4B**) and the GSEA analysis was repeated.  
181 Among all the alterations, the E2F targets constituted the most dramatically and consistently  
182 downregulated set in both the C4-2 and 22RV1 cells (**Fig. 4C**). This observation was further  
183 confirmed by another database of transcription factor binding sites, TRANSFAC(Kaplun *et al*,  
184 2016) (**Fig. 4D**). Moreover, our results showed that both the protein level (**Fig. 4E**) and mRNA  
185 level (**Fig. 4F**) of E2F1 decreased after administering the ivermectin treatment in a  
186 dose-dependent manner. E2F1 activity is important to drive the cell cycle from the G1 to the S  
187 phase(Fang *et al*, 2020), consisting with our finding in cell functional analysis. To further  
188 explore the interaction between ivermectin and E2F1, the CETSA(Jafari *et al*, 2014; Molina *et al*,  
189 2013) was performed. However, we failed to identify the direct binding between ivermectin and  
190 E2F1 in C4-2 cells (**Fig. 4G**), indicating E2F1 was not a direct target of ivermectin. Collectively,  
191 these data suggested that ivermectin could target other proteins that regulate E2F1 expression at  
192 the transcriptional level.

193

#### 194 **Ivermectin bound and blocked the function of pioneer factor FOXA1**

195 FOXA1 is a pioneer transcription factor that functions to loosen the compact chromatin to  
196 facilitate the binding of steroid receptors such as estrogen receptor and AR(Gao *et al*, 2019). A  
197 recent study showed that FOXA1 could promote G1 to the S-phase transit by acting as an  
198 upstream regulator of E2F1(Zhang *et al*, 2011). These findings, along with the effect of  
199 ivermectin on prostate cancer, suggest that FOXA1 is a potential candidate target of ivermectin.  
200 To address this, the first step was to analyze the effect of ivermectin on FOXA1 regulated genes.  
201 GSEA revealed that genes induced by FOXA1 in the absence of androgens(Jin *et al*, 2013)



202 significantly overlapped with those repressed by ivermectin (**Fig. 5A, left**). This observation was  
203 confirmed by RT-qPCR. FOXA1-induced genes decreased significantly in the ivermectin-treated  
204 group (**Fig. 5B, left**). However, the alteration of FOXA1-repressed genes was not significant  
205 (**Fig. 5A, right**). In contrast to FOXA1-induced genes, FOXA1-repressed genes oppose the  
206 action of AR signaling and are reported to correlate with epithelial mesenchymal transformation  
207 (EMT)(Jin *et al.*, 2013). RT-qPCR showed that the expression of EMT-related genes, including  
208 *MET*, *MMP7*, and *SOX9*, decreased (**Fig. 5B, right**). Moreover, the western blot results showed  
209 that the expression of N-cadherin decreased consistently after the ivermectin treatment, while the  
210 expression of FOXA1 decreased only slightly (**Fig. 5C**). These results indicate that ivermectin  
211 could inhibit FOXA1 signaling activity without promoting cancer metastasis, unlike other drugs  
212 targeting FOXA1(Wang *et al.*, 2020).

213  
214 Next, we explored how ivermectin inhibited FOXA1 expression in prostate cancer. ChIP-qPCR  
215 and FAIRE-qPCR were performed to explore DNA binding and chromatin accessibility  
216 alterations (Jin *et al.*, 2014a; Simon *et al.*, 2012a). As shown in **Fig. 5D**, the ivermectin treatment  
217 increased FOXA1 binding and decreased chromatin accessibility and AR binding on the  
218 ARE+FKHD sites of *KLK3* and *NKX3-1*. Similar changes on the ARE+FKHD sites have also  
219 been reported by Jin *et al.*(Jin *et al.*, 2014a). The authors concluded that excessive FOXA1  
220 enlarges open chromatin regions, which serve as reservoirs that retain AR via abundant  
221 half-AREs, thereby reducing AR availability for specific sites. However, we found that although  
222 the FOXA1 binding of FKHD-only sites (*E2F1* and *MET*) increased, chromatin was less  
223 accessible (**Fig. 5E**). These results were confirmed using the specific ARE+FKHD sites and  
224 FKHD-only sites derived from AR and FOXA1 ChIP-seq analysis(Jin *et al.*, 2014a)  
225 (**Supplementary Fig. S4A**). Increased FOXA1 binding and decreased chromatin accessibility  
226 were observed after the ivermectin treatment (**Supplementary Fig. S4B and S4C**). In addition,  
227 FOXA1 siRNA transfection alleviated the effect of ivermectin on *KLK3* and *E2F1* mRNA

228 expression (**Fig. 5F**). Based on these findings, we considered that FOXA1 might be locked on  
229 chromatic but unable to loosen the compact chromatin in the presence of ivermectin, thereby  
230 inhibiting the transcription of FOXA1 targets, including E2F1 and AR signaling.  
231 Third, the direct binding between FOXA1 and ivermectin was evaluated using CETSA. Our  
232 results showed that ivermectin caused the thermal stabilization of FOXA1 in LNCaP and C4-2  
233 cells, but did not affect the thermal stability of AR (**Fig. 5G and 5H**). Increased thermal stability  
234 of FOXA1 (**Fig. 5I**) and downregulation of FOXA1 target genes (**Fig. 5J**) were also identified in  
235 22RV1 cells. In line with the results obtained for C4-2 cells, the effect of ivermectin on E2F1  
236 expression was blocked by FOXA1 knockdown (**Fig. 5K**). Meanwhile, increased FOXA1  
237 binding, decreased accessibility, and AR binding were observed in 22RV1 cells (**Fig. 5L**). Thus,  
238 ivermectin could target FOXA1 and reduce accessibility in ARV-positive situations.

239

#### 240 **The TPP-TR assay revealed that Ku70/Ku80 were additional targets of ivermectin**

241 It is difficult to explain such remarkable cell inhibition after the ivermectin treatment via only  
242 targeting FOXA1. Many studies have revealed that ivermectin affects multiple signaling  
243 pathways in tumor cells and has been labeled as a “multitargeted” drug(Juarez *et al.*, 2018a).  
244 Herein, we performed CETSA in a temperature-range thermal proteome profiling (TPP-TR)  
245 format, in which protein stability is probed by a mass spectrum, to explore the direct target of  
246 ivermectin drugs comprehensively(Berglund *et al.*, 2016; Dai *et al.*, 2019; Franken *et al.*, 2015;  
247 Kitagawa *et al.*, 2017; Saei *et al.*, 2020). The 22RV1 cells were either treated or not with  
248 ivermectin (50  $\mu$ M), and 4,433 complete melting curves were obtained (**Fig. 6A**). The proteins  
249 with melting temperature differences ( $\Delta T_m$ ) greater than  $\pm 3$   $^{\circ}$ C were then screened and  
250 subjected to KOBAS KEGG/GO analysis(Jin *et al.*, 2014b). We found that targets related to the  
251 NHEJ repair pathway (KEGG) and cellular response to gamma radiation (GO) were significantly  
252 enriched (**Fig. 6B**). Ku70/Ku80 are important proteins for NHEJ repair. They form heterodimers  
253 and recruit DNA-protein kinase catalytic subunit (DNA-PKcs) to the damaged sites that initiate

254 the rejoining of DSB ends(Dietlein *et al*, 2014). The elevated thermal stabilization of Ku70/Ku80  
255 was detected by TPP-TR (**Fig. 6C**) and confirmed by classic CETSA (**Supplementary Fig.**  
256 **S5A**), indicating a direct interaction between ivermectin and the two NHEJ repair proteins.  
257 Moreover, we performed CETSA in LNCaP and C4-2 cells. Consistently, the ivermectin  
258 treatment increased the thermal stabilization of Ku70/Ku80 (**Fig. 6D and 6E**). Together, these  
259 findings show that Ku70/Ku80 are additional direct targets of ivermectin.

260

261 Next, we examined whether the interaction between ivermectin and Ku70/Ku80 influences DNA  
262 DSB repair efficiency. The GSEA of gene ontology (GO) gene set revealed ivermectin could  
263 decrease the expression of genes associated with DNA repair, with pathway enrichment for DNA  
264 recombination repair, DNA recombination, and double strand break repair (**Fig. 7A**). Through  
265 western blot, we found ivermectin decreased the expression of homologous recombination (HR)  
266 repair pathway executor BRCA1 and Rad51, and inhibited the recruitment of Ku70/Ku80 to the  
267 DNA damage site in C4-2 (**Fig. 7B**) and 22RV1(**Fig. 7C**) cells. The BRCA1 and Rad1 were  
268 reported as downstream targets of AR(Li *et al*, 2017; Thompson *et al*, 2017) and their mRNA  
269 level was consistently decreased after ivermectin treatment (**Supplementary Fig. S5B**). In  
270 addition, we evaluated DSB repair efficiency using fluorescent reporter constructs, in which a  
271 functional GFP gene was reconstituted following an HR or NHEJ event(Seluanov *et al*, 2010).  
272 As expected, the NHEJ and HR repair efficiencies were significantly reduced in  
273 ivermectin-treated cells (**Fig. 7D and 7E**).

274

275 Synthetic lethality has been identified between HR and NHEJ repair(Burdak-Rothkamm *et al*,  
276 2020; Dietlein *et al.*, 2014). Based on our results, the inhibition of Ku70/80 recruitment was  
277 much more obvious at high doses of ivermectin (12  $\mu$ M) (**Fig. 7B and 7C**), which is in line with  
278 the finding that ivermectin-induced apoptosis was most dramatic at high doses (**Fig. 2B**). We  
279 repeated the R1881 experiment with a high-dose ivermectin treatment and found that the R1881

280 treatment only increased the protein level of Rad51, but exerted no effect on Ku80. The  
281 increased HR repair decreased ivermectin-induced cell apoptosis (**Supplementary Fig. S5C**). In  
282 AR-negative DU145 cells, CETSA confirmed that ivermectin also bound to Ku70  
283 (**Supplementary Fig. S5D**). The ivermectin treatment did not decrease Rad51 expression, but  
284 inhibited the recruitment of Ku70/Ku80 to the DNA damage site (**Supplementary Fig. S5E**).  
285 The existence of the HR repair pathway decreased the effect of ivermectin in DU145 cells  
286 (**Supplementary Fig. S2B**). Overall, these findings suggest that ivermectin could block NHEJ  
287 repair by binding to Ku70/Ku80 and HR repair by downregulating the expression of BRCA1 and  
288 Rad51, thereby triggering synthetic lethality in AR-positive prostate cancer cells.

289

## 290 **Discussion**

291 In this study, we reported that ivermectin, an antiparasitic drug, showed promising anticancer  
292 activity against prostate cancer progression. Ivermectin was primarily developed for the  
293 treatment of onchocerciasis caused by the parasite *Onchocerca volvulus* in poor populations  
294 around the tropics(Crump, 2017). Recently, research has shed light on the potential of ivermectin  
295 as an antibacterial(Lim *et al*, 2013; Pettengill *et al*, 2012), antiviral(Heidary & Gharebaghi, 2020;  
296 Kosyna *et al*, 2015), and anti-cancer agent(Juarez *et al.*, 2018a; Tang *et al.*, 2020). In particular,  
297 owing to its wide margin of clinical safety(De Sole *et al*, 1990), ivermectin is an ideal candidate  
298 for drug repurposing and has been listed in the drug repurposing hub established by the Broad  
299 Institute(Corsello *et al*, 2017). Our results indicate that ivermectin inhibited dramatically prostate  
300 cancer in cell lines representing the hormone-sensitive stage (LNCaP), castration resistance stage  
301 (C4-2), and AR variant positive stage (22RV1). In addition, there is controversy regarding the  
302 cellular targets of ivermectin, and several alternative action mechanisms have been proposed. To  
303 address this issue, we performed an integrated analysis including RNA-seq and TPP-TR to  
304 identify the direct targets of ivermectin in prostate cancer. Our data showed that ivermectin could  
305 bind to FOXA1 and Ku70/Ku80 directly and inhibit AR signaling, E2F1 expression, and DNA

306 damage repair activity, thereby leading to G0/G1 cell cycle arrest, DNA damage, and trigger  
307 synthetic lethality (**Fig. 8**).

308

309 In our study, ivermectin suppressed AR signaling in CRPC-and ARVs-positive CRPC cells.  
310 Targeting the AR signaling axis is the mainstay of prostate cancer therapy. However, stronger  
311 inhibition of AR signaling also leads to cancer cell resistance to anti-androgens. In the CRPC  
312 stage, AR undergoes changes in expression(Abida *et al.*, 2019), structure(Kumar *et al.*, 2016) and  
313 intracellular localization(Lv *et al.*, 2020). These alterations cause AR signaling to re-activate and  
314 promote cancer cell proliferation even in the presence of secondary anti-androgens, such as  
315 enzalutamide or apalutamide(Fujita & Nonomura, 2019). Herein, we reported that ivermectin  
316 could continue blocking AR signaling in both CRPC-and ARV-positive CRPC cells. In contrast  
317 to other anti-androgens, ivermectin targets AR through two different mechanisms. First,  
318 ivermectin inhibited the AR transcription activity. Our results indicated that ivermectin could  
319 block the R1881 induced AR activity in LNCaP and C4-2 cells without significantly reducing  
320 AR levels in various prostate cancer cell lines. Second, ivermectin decreased the expression of  
321 AR. Nappi *et al.* proved that ivermectin promotes AR degradation by targeting HSP27(Nappi *et*  
322 *al.*, 2020). This combination effect of ivermectin makes it possible to overcome the reactivation  
323 of AR induced by overexpression and splice variants. Thus, ivermectin is considered a promising  
324 novel antiandrogen for the treatment of enzalutamide-resistant CRPC.

325

326 Our research revealed that ivermectin is a novel inhibitor of FOXA1, which blocks the AR and  
327 E2F1 signaling pathways. Wang *et al.* reported that the bromodomain and extraterminal domain  
328 (BET) inhibitor JQ1 could independently inhibit FOXA1 and promote prostate cancer  
329 invasion(Wang *et al.*, 2020). In our study, we identified that ivermectin bound to FOXA1  
330 directly via CETSA. Ivermectin disturbed the pioneering function of FOXA1 and decreased  
331 chromatin accessibility. In contrast to JQ1, ivermectin also downregulated the expression of

332 EMT genes, such as *MET*, *MMP7*, and *SOX9*, and did not induce EMT in prostate cancer. This  
333 suggests that the interaction of FOXA1 with ivermectin is different from its interaction with JQ1.  
334 Unlike ivermectin, JQ1 did not affect the binding of FOXA1 to its target genes, but inhibited  
335 FOXA1 binding to repressors(Wang *et al.*, 2020). A recent large-scale integrative genomics  
336 study showed that the mutation frequency of FOXA1 is up to 41% in Asian populations(Li *et al.*,  
337 2020). The mutations of FOXA1 altered its pioneering activity, perturbing normal luminal  
338 epithelial differentiation programs, and prompting prostate cancer progression(Adams *et al.*,  
339 2019). Thus, targeting FOXA1 transcription is a very important therapeutic strategy for CRPC  
340 treatment. Ivermectin should be further developed as a potent FOXA1 inhibitor.

341  
342 Our analysis concluded that ivermectin can promote prostate cancer cell death by triggering  
343 synthetic lethality. TPP is a high-throughput method for accessing ligand binding in living cells  
344 based on the thermal stability of proteins(Franken *et al.*, 2015; Savitski *et al.*, 2014). In our  
345 TPP-TR analysis, Ku70/Ku80 stood out as an additional target of ivermectin. The Ku70/Ku80  
346 heterodimer is the DNA-binding component of DNA-dependent protein kinase, and forms a ring  
347 that can specifically bind to exposed broken DNA ends, which is an early and upstream event of  
348 NHEJ(Ai *et al.*, 2017; Dietlein *et al.*, 2014). Our research showed that ivermectin inhibits the  
349 recruitment of Ku70/Ku80 to the DNA damage site, thus decreasing the NHEJ repair capacity. In  
350 addition, as downstream targets of AR, the HR repair genes BRCA1 and Rad51 could be  
351 repressed by AR inhibitors(Li *et al.*, 2017; Thompson *et al.*, 2017) and were downregulated after  
352 the ivermectin treatment. As both are important for DSB repair, the concurrent inhibition of HR  
353 and NHEJ could lead to synthetic lethality(Burdak-Rothkamm *et al.*, 2020; Dietlein *et al.*, 2014).  
354 These results were further supported by RNA-seq analysis, as the P53 pathway was highly  
355 activated after the ivermectin treatment. Thus, the inhibition of Ku70/Ku80 is an important  
356 component of the carcinogenic inhibition of ivermectin in prostate cancer.

357

358 **Conclusion**

359 In summary, our results indicate that ivermectin suppressed the AR and E2F signaling pathways,  
360 and DNA damage repair capacity by directly targeting FOXA1 and Ku70/Ku80 to inhibit cell  
361 proliferation and promote cell apoptosis in prostate cancer. These findings provide insight into  
362 both the effects and mechanisms of ivermectin as an anticancer agent. This raises the possibility  
363 of broadening the clinical evaluation of ivermectin for the treatment of prostate cancer.

364

365 **Methods**

366 **Cell Culture**

367 Prostate cancer cell lines LNCaP, VCaP, and 22RV1 were purchased from Procell Life Science  
368 & Technology Co. Ltd. (Wuhan, China). DU145 cell lines were purchased from the American  
369 Type Culture Collection (Manassas). C4-2 and LNCaP95 were kindly provided by Dr. Leland  
370 WK Chung (Cedars-Sinai Medical Center, Los Angeles, CA) and Dr. Jun Luo (Johns Hopkins  
371 University, Baltimore, MD), respectively. VCaP cells were cultured in DMEM (Lonza), while  
372 other prostate cancer cells were cultured in RPMI 1640 (Corning). Media were supplemented  
373 with 10% FBS (Atlanta Biologicals) or charcoal-stripped FBS (for LNCaP95 cell line) and 1%  
374 penicillin/streptomycin. The human prostate primary cells were generated from benign prostatic  
375 hyperplasia patient by us previously(Chen *et al.*, 2020) and cultured in 50/50 Dulbecco's  
376 modified Eagle's medium (DMEM)/F12 (Corning), supplemented with 1 µg/mL insulin-  
377 transferrin-selenium-X (Invitrogen), 0.4% bovine pituitary extract (Gibco), and 3 ng/mL  
378 epidermal growth factor (Gibco). Mycoplasma contamination was tested by PCR.

379

380 **MTT assay**

381 Prostate cancer cells and nontumorigenic human prostate primary cells derived from benign  
382 prostatic hyperplasia (BPH) patients(Chen *et al.*, 2020) were seeded in 96-well plates. The cells  
383 were treated with ivermectin (Selleck) at various concentrations with or without enzalutamide

384 (Selleck). Cells were then grown for a further 24, 48 or 72 hours. Cell viability was evaluated by  
385 the 3-(4,5-dimethylthiazol-2-yl)-2,5-diphenyltetrazolium bromide (MTT, Sigma) assay as  
386 described previously(Lv *et al*, 2018).

387

### 388 **Cell cycle analysis**

389 Prostate cells were seeded in 6-well plates and treated with ivermectin at indicated  
390 concentrations with or without enzalutamide for 48 hours. Cell cycle distribution was analyzed  
391 with PI staining (BD Biosciences). The stained cells were acquired by flow cytometry (BD  
392 Biosciences) and analyzed by FlowJo software.

393

### 394 **Cell apoptosis analysis**

395 Prostate cells were seeded in 6-well plates and treated with ivermectin at indicated  
396 concentrations for 48 hours. Cell apoptosis was analyzed with FITC Annexin V Apoptosis  
397 Detection Kit (BD Biosciences). The stained cells were acquired by flow cytometry and analyzed  
398 by FlowJo software. The FITC Annexin V positive and PI negative or FITC Annexin V and PI  
399 positive were measured as apoptosis cells.

400

### 401 **Western blot**

402 Prostate cancer cells were lysed by RIPA buffer containing proteasome inhibitor cocktail (Sigma)  
403 or performed nucleocytoplasmic fractionation according to the manufacturer's instructions  
404 (G-Biosciences). The samples were analyzed by immunoblotting with primary antibodies to:  
405 PARP (Cell Signaling Technology Cat# 9532, 1:1000), cleaved-caspase 3 (Cell Signaling  
406 Technology, Cat# 9664, 1:1000),  $\gamma$ H2A.X (Cell Signaling Technology Cat# 2577, 1:1000), AR  
407 (Santa Cruz Biotechnology Cat# sc-7305, 1:1000), PSA (Cell Signaling Technology Cat# 5365,  
408 1:1000), UBE2C (Cell Signaling Technology Cat# 14234, 1:200), E2F1 (Cell Signaling  
409 Technology Cat# 3742, 1:1000), FOXA1 (Cell Signaling Technology Cat# 53528, 1:1000),



410 Ku70 (Cell Signaling Technology Cat# 4588, 1:1000), Ku80 (Cell Signaling Technology Cat#  
411 2180, 1:1000) , BRCA1 (Cell Signaling Technology Cat# 9009, 1:1000), Rad51 (Cell Signaling  
412 Technology Cat# 8875, 1:1000), Lamin B (Cell Signaling Technology Cat# 13435, 1:1000),  
413 GAPDH (Santa Cruz Biotechnology Cat# sc-47724, 1:1000).

414

#### 415 **Comet assay**

416 Prostate cancer cells were seeded in 12-well plates treated with ivermectin at indicated  
417 concentrations or doxorubicin (DU145 cells, positive control) for 48 hours and collected for  
418 DNA damage analysis. DNA damage was quantified using a neutral comet assay by comet assay  
419 kit, (Trevigen) following the manufacturer's protocol.

420

#### 421 **Senescence-associated (SA)- $\beta$ -galactosidase cytochemical staining**

422 Prostate cancer cells were plated into 12-well plates treated with ivermectin at indicated  
423 concentrations for 48 hours. Then the cells were fixed in 4% paraformaldehyde and analyzed  
424 using an SA- $\beta$ -Gal kit (Cell Signaling Technology).

425

#### 426 **Xenograft tumor model**

427 BALB/c-nude mice (6–8-week-old) were purchased from the Nanfang Hospital and maintained  
428 under pathogen-free conditions. The animal use protocol was approved by the Institutional  
429 Animal Care and Use Committee in Nanfang Hospital. 22RV1 cells ( $3 \times 10^6$ ) suspended in 150  
430  $\mu$ l medium were gently mixed with 150  $\mu$ l of Matrigel (Corning) and then inoculated  
431 subcutaneously in the right flank region of each mouse. Castration was performed after tumor  
432 volume reached 300 mm<sup>3</sup> and treatment was initiated 4 days later. Tumor-bearing BALB/c-nude  
433 mice were randomly assigned into two groups and treated with Ivermectin (10 mg/kg, 3 times  
434 per week) or vehicle (DMSO:EtOH:Kalliphor/PBS 1:1:8/10). Tumor volume measurements were  
435 performed per 3 days and calculated by the formula length  $\times$  width  $\times$  depth  $\times$  0.52.

436

### 437 **Histology and immunohistochemistry**

438 Tumors were immediately fixed in 10% neutral buffered formalin for 24 hours, progressively  
439 dehydrated in solutions containing an increasing percentage of ethanol and embedded into  
440 paraffin blocks. Consecutive 4- $\mu$ m sections were obtained from paraffin blocks. Sections were  
441 counterstained with haematoxylin and eosin (H&E), or immunoassayed using antibody to Ki67  
442 (Dako, M7240, 1:100),  $\gamma$ H2A.X (Cell Signaling Technology Cat# 80312, 1:200) and PSA (Cell  
443 Signaling Technology Cat# 2475, 1:1000) through the immunoperoxidase technique.

444

### 445 **Reverse transcriptase quantitative PCR (RT-qPCR)**

446 Prostate cancer cells were seeded in 6-well plates and treated with ivermectin at indicated  
447 concentration for 48 hours. RNA from cells was isolated by TRIzol Reagent (Invitrogen).  
448 Reverse transcription was performed with 1  $\mu$ g RNA using PrimeScript RT reagent Kit (Takara).  
449 The cDNA was amplified with gene-specific primers (Supplemental Table 1) and SYBR Premix  
450 Ex Taq II kit (TaKaRa). Data were analyzed using a  $2^{-\Delta\Delta C_t}$  method.

451

### 452 **RNA-seq and GSEA analysis**

453 C4-2 and 22RV1 cells were treated with 8 or 12  $\mu$ M ivermectin for 48 hours, and total RNA was  
454 extracted by TRIzol Reagent for RNA-Seq analysis. The sequencing data were deposited in the  
455 NCBI's Gene Expression Omnibus (GEO) database (GSE169356). Differentially expressed  
456 genes were identified by filtering, with a  $|\log_2(\text{FoldChange})| > 1$  and  $p \text{ adj} < 0.05$ . GSEA was  
457 performed using the GSEA Java program (<https://www.gsea-msigdb.org/gsea/index.jsp>).  
458 Normalized enrichment score (NES) and  $p$  values are shown in the figures.

459

### 460 **ChIP-qPCR**

461 ChIP assays were performed using a Pierce Agarose ChIP Kit (Thermo Fisher Scientific)  
462 according to the manufacturer's protocol. FOXA1 (Abcam, #ab170933), AR (Abcam,  
463 #ab108341), and corresponding control IgG antibodies were used. The qPCR assays were carried  
464 out using the chromatin samples as prepared above. The primer sequences are listed in  
465 Supplemental Table 1.

466

#### 467 **Formaldehyde-assisted isolation of regulatory elements qPCR (FAIRE-qPCR)**

468 FAIRE was performed as previously described (Simon *et al.*, 2012b). Briefly, ivermectin treated  
469 C4-2 and 22RV1 cells were cross-linked by formaldehyde and the chromatin fractions were  
470 sheared and extracted identically as for ChIP. Input samples were reverse cross-linked overnight  
471 at 65 °C. The FAIRE samples and reverse cross-linked input samples were subjected to two  
472 sequential phenol/chloroform/isoamyl alcohol (25/24/1, Sigma) and one chloroform/isoamyl  
473 alcohol (24/1, Sigma) extractions. DNA was precipitated with ethanol and treated with RNase A  
474 (Invitrogen) for 30 min at 37 °C. Proteins were then digested by proteinase K and DNA-DNA  
475 cross-links were reversed by incubating overnight at 65 °C. FAIRE DNA was next purified by  
476 Zymo-I spin columns (Zymo) and detected by qPCR assay.

477

#### 478 **Cellular thermal shift assay (CETSA)**

479 The CETSA assay was performed as previously described (Lv *et al.*, 2020). Prostate cancer cells  
480 were treated with 50 µM ivermectin for 1 hour. Cells were suspended in PBS with protease  
481 inhibitors, heated at the indicated temperature for 3 minutes. Samples were subjected to 3  
482 freeze-thaw cycles freeze-thaw using liquid nitrogen and centrifuged. Supernatants were  
483 collected and detected by western blot.

484

#### 485 **siRNA transfection**

486 FOXA1 siRNA and negative control siRNA were synthesized by Ribobio company.  
487 Lipofectamine 2000 (Thermo Fisher) was used to transfect these siRNAs into cells.

488

### 489 **Temperature-range thermal proteome profiling (TPP-TR)**

490 Target identification was performed by CETSA coupled with quantitative mass spectrometry  
491 using the standard protocol(Franken *et al.*, 2015). In brief, 22RV1 cells were treated by 50  $\mu$ M  
492 ivermectin for 1 hour and lysed by combination of freeze/thaw. The supernatant was transferred  
493 into microtubes for MS-sample preparation. At least 100  $\mu$ g of the protein of lowest temperature  
494 group (measured with a BCA assay) and equal volume of supernatants was subjected to be  
495 labeled by isobaric tandem mass tag 10-plex (TMT10) reagents corresponding to each  
496 temperature point. The pooled fractions from each experiment were analyzed using liquid  
497 chromatography Easy nLC system (Thermo Fisher Scientific) combined with Q Exactive plus  
498 spectrometer (Thermo Fisher Scientific). MS/MS raw files were processed using MASCOT  
499 engine (Matrix Science; version 2.6) embedded into Proteome Discoverer 2.2 (Thermo Fisher  
500 Scientific). The reference protein database used was the  
501 Uniprot\_HomoSapiens\_20367\_20200226 database. The analysis of the protein quantification  
502 data from the ivermectin- and DMSO-treated samples is performed using the TR functionality of  
503 the TPP package by R.

504

### 505 **DNA damage repair assays**

506 Plasmids containing NHEJ, HR reporter cassettes and pDsRed-N1 as the internal controls were  
507 kindly provided by Dr Zhiyong Mao from the School of Life Science and Technology of Tongji  
508 University (Shanghai, China)(Seluanov *et al.*, 2010). Plasmids containing NHEJ or HR reporter  
509 cassettes were linearized by I-SceI restriction enzymes (NEB) and purified using GeneJET PCR  
510 purification kit (Thermo Fisher Scientific). Cells were transfected with 0.5  $\mu$ g of NHEJ reporter  
511 construct or 2  $\mu$ g of HR reporter construct, and 0.1  $\mu$ g of pDsRed-N1 as internal control by

512 Turbofect (Thermo Fisher Scientific). After 6 hours, the culture medium was replaced by fresh  
513 medium containing ivermectin (8  $\mu$ M). Cells were analyzed by flow cytometry 48 hours after  
514 transfection.

515

### 516 **Statistical analysis**

517 Statistical analysis was performed using GraphPad Prism (Version 8.2.1, for macOS, GraphPad  
518 Software). Data are presented as the mean  $\pm$  SD. A parametric t-test (two groups) and one-way  
519 ANOVA followed by Dunnett's multiple-comparisons post-test (for more than two groups) were  
520 used when the data sets were found to be normally distributed, with F test comparison of  
521 variances or Bartlett's test of equal variances, respectively. For the data in all figures, statistical  
522 significance was set at \*P < 0.05, \*\*P < 0.01, \*\*\*P < 0.001.

523

### 524 **Abbreviations:**

525 AR: Androgen receptor

526 FOXA1: Forkhead box protein A1

527 NHEJ: Non-homologous end joining

528 ADT: Androgen deprivation treatment

529 CRPC: Castration-resistant prostate cancer

530 ROS: Reactive oxygen species

531 DSB: DNA double-strand break

532 BPH: Benign prostatic hyperplasia

533 CHX: Cycloheximide

534 NES: Normalized enrichment score

535 PDB: Protein Data Bank

536 PSA: Prostate-specific antigen

537 AR-FL: Full-length AR

538 ARVs: AR variants

539 GSEA: Gene set enrichment analysis

540 DEGs: Differentially expressed genes

541 CETSA: Cellular thermal shift assay

542 EMT: Epithelial mesenchymal transformation

543 FAIRE-qPCR: Formaldehyde-assisted isolation of regulatory elements qPCR

544 TPP-TR: Temperature-range thermal proteome profiling

545 DNA-PKcs: DNA-protein kinase catalytic subunit

546 HR: Homologous recombination

547

#### 548 **Availability of data and material**

549 The sequencing data were deposited in the NCBI's Gene Expression Omnibus (GEO) database  
550 (GSE169356).

551

#### 552 **Competing interests**

553 No potential conflict of interest was reported by the authors.

554

#### 555 **Funding**

556 This work was funded in part by China Postdoctoral Science Foundation 2020M682800; by  
557 Natural Science Foundation of Guangdong Province 2021A1515011023 (to Shidong Lv); by  
558 National Natural Science Foundation of China 81872092(to Qiang Wei), NIH grant R50  
559 CA211242 (to LEP), and Department of Urology, University of Pittsburgh (to Zhou Wang).

560

#### 561 **Acknowledgements**

562 We would like to thank Dr. Leland W.K. Chung for C4-2 cells and Dr. Jun Luo for LNCaP95  
563 cells.

564

565 **Author Contribution Statement**

566 SL and ZeW carried out the cell function and molecular mechanism studies, participated in the  
567 sequence analysis, and drafted the manuscript. ML participated in the sequence analysis and  
568 performed the statistical analysis. YZ was in charge of the TPP-TR data analysis and participated  
569 in figure organization. JZ participated in the ChIP assay. LEP helped revise the manuscript. ZW  
570 and QW conceived of the study, and participated in its design and coordination, and helped to  
571 draft the manuscript.

572

573 **Reference**

- 574 Abida W, Cyrta J, Heller G, Prandi D, Armenia J, Coleman I, Cieslik M, Benelli M, Robinson D, Van Allen EM *et*  
575 *al* (2019) Genomic correlates of clinical outcome in advanced prostate cancer. *Proc Natl Acad Sci U S A* 116:  
576 11428-11436
- 577 Adams EJ, Karthaus WR, Hoover E, Liu D, Gruet A, Zhang Z, Cho H, DiLoreto R, Chhangawala S, Liu Y (2019)  
578 FOXA1 mutations alter pioneering activity, differentiation and prostate cancer phenotypes. *Nature* 571: 408-412
- 579 Ai J, Pascal LE, Wei L, Zang Y, Zhou Y, Yu X, Gong Y, Nakajima S, Nelson JB, Levine AS (2017) EAF2 regulates  
580 DNA repair through Ku70/Ku80 in the prostate. *Oncogene* 36: 2054-2065
- 581 Berglund UW, Sanjiv K, Gad H, Kalderen C, Koolmeister T, Pham T, Gokturk C, Jafari R, Maddalo G,  
582 Seashore-Ludlow B (2016) Validation and development of MTH1 inhibitors for treatment of cancer. *Annals of*  
583 *oncology* 27: 2275-2283
- 584 Burdak-Rothkamm S, Mansour WY, Rothkamm K (2020) DNA damage repair deficiency in prostate cancer. *Trends*  
585 *in Cancer*
- 586 Campbell W, Fisher M, Stapley E, Albers-Schonberg G, Jacob T (1983) Ivermectin: a potent new antiparasitic agent.  
587 *Science* 221: 823-828
- 588 Carceles-Cordon M, Kelly WK, Gomella L, Knudsen KE, Rodriguez-Bravo V, Domingo-Domenech J (2020)  
589 Cellular rewiring in lethal prostate cancer: The architect of drug resistance. *Nature reviews Urology* 17: 292-307
- 590 Chen W, Pascal LE, Wang K, Dhir R, Sims AM, Campbell R, Gasper G, DeFranco DB, Yoshimura N, Wang Z  
591 (2020) Differential impact of paired patient-derived BPH and normal adjacent stromal cells on benign prostatic  
592 epithelial cell growth in 3D culture. *The Prostate* 80: 1177-1187
- 593 Corsello SM, Bittker JA, Liu Z, Gould J, McCarren P, Hirschman JE, Johnston SE, Vrcic A, Wong B, Khan M  
594 (2017) The Drug Repurposing Hub: a next-generation drug library and information resource. *Nature medicine* 23:  
595 405-408
- 596 Crump A (2017) Ivermectin: enigmatic multifaceted ‘wonder’ drug continues to surprise and exceed expectations.  
597 *The Journal of antibiotics* 70: 495-505

- 598 Dai L, Prabhu N, Yu LY, Bacanu S, Ramos AD, Nordlund P (2019) Horizontal cell biology: monitoring global  
599 changes of protein interaction states with the proteome-wide cellular thermal shift assay (CETSA). *Annual review of*  
600 *biochemistry* 88: 383-408
- 601 Davis ID, Martin AJ, Stockler MR, Begbie S, Chi KN, Chowdhury S, Coskinas X, Frydenberg M, Hague WE,  
602 Horvath LG (2019) Enzalutamide with standard first-line therapy in metastatic prostate cancer. *New England*  
603 *Journal of Medicine* 381: 121-131
- 604 De Sole G, Dadzie K, Giese J, Remme J (1990) Lack of adverse reactions in ivermectin treatment of onchocerciasis.  
605 *Lack of adverse reactions in ivermectin treatment of onchocerciasis* 335: 1106-1107
- 606 Dietlein F, Thelen L, Reinhardt HC (2014) Cancer-specific defects in DNA repair pathways as targets for  
607 personalized therapeutic approaches. *Trends in genetics* 30: 326-339
- 608 Dou Q, Chen H-N, Wang K, Yuan K, Lei Y, Li K, Lan J, Chen Y, Huang Z, Xie N (2016) Ivermectin induces  
609 cytostatic autophagy by blocking the PAK1/Akt axis in breast cancer. *Cancer research* 76: 4457-4469
- 610 Fang Z, Lin M, Li C, Liu H, Gong C (2020) A comprehensive review of the roles of E2F1 in colon cancer. *Am J*  
611 *Cancer Res* 10: 757-768
- 612 Franken H, Mathieson T, Childs D, Sweetman GM, Werner T, Tögel I, Doce C, Gade S, Bantscheff M, Drewes G  
613 (2015) Thermal proteome profiling for unbiased identification of direct and indirect drug targets using multiplexed  
614 quantitative mass spectrometry. *Nature protocols* 10: 1567-1593
- 615 Fujita K, Nonomura N (2019) Role of androgen receptor in prostate cancer: a review. *The world journal of men's*  
616 *health* 37: 288
- 617 Gao S, Chen S, Han D, Barrett D, Han W, Ahmed M, Patalano S, Macoska JA, He HH, Cai C (2019) Forkhead  
618 domain mutations in FOXA1 drive prostate cancer progression. *Cell research* 29: 770-772
- 619 Halabi S, Kelly WK, Ma H, Zhou H, Solomon NC, Fizazi K, Tangen CM, Rosenthal M, Petrylak DP, Hussain M  
620 (2016) Meta-analysis evaluating the impact of site of metastasis on overall survival in men with castration-resistant  
621 prostate cancer. *Journal of clinical oncology* 34: 1652
- 622 Heidary F, Gharebaghi R (2020) Ivermectin: a systematic review from antiviral effects to COVID-19  
623 complementary regimen. *The Journal of antibiotics* 73: 593-602
- 624 Jafari R, Almqvist H, Axelsson H, Ignatushchenko M, Lundbäck T, Nordlund P, Molina DM (2014) The cellular  
625 thermal shift assay for evaluating drug target interactions in cells. *Nature protocols* 9: 2100
- 626 Jin H-J, Zhao JC, Ogden I, Bergan RC, Yu J (2013) Androgen receptor-independent function of FoxA1 in prostate  
627 cancer metastasis. *Cancer research* 73: 3725-3736
- 628 Jin H-J, Zhao JC, Wu L, Kim J, Yu J (2014a) Cooperativity and equilibrium with FOXA1 define the androgen  
629 receptor transcriptional program. *Nature communications* 5: 1-14
- 630 Jin J, Zhang H, Kong L, Gao G, Luo J (2014b) PlantTFDB 3.0: a portal for the functional and evolutionary study of  
631 plant transcription factors. *Nucleic acids research* 42: D1182-D1187
- 632 Juarez M, Schcolnik-Cabrera A, Duenas-Gonzalez A (2018a) The multitargeted drug ivermectin: from an  
633 antiparasitic agent to a repositioned cancer drug. *Am J Cancer Res* 8: 317-331
- 634 Juarez M, Schcolnik-Cabrera A, Dueñas-Gonzalez A (2018b) The multitargeted drug ivermectin: from an  
635 antiparasitic agent to a repositioned cancer drug. *American journal of cancer research* 8: 317



- 636 Kaplun A, Krull M, Lakshman K, Matys V, Lewicki B, Hogan JD (2016) Establishing and validating regulatory  
637 regions for variant annotation and expression analysis. *BMC genomics* 17: 219-227
- 638 Kitagawa M, Liao P-J, Lee KH, Wong J, Shang SC, Minami N, Sampetean O, Saya H, Lingyun D, Prabhu N (2017)  
639 Dual blockade of the lipid kinase PIP4Ks and mitotic pathways leads to cancer-selective lethality. *Nature*  
640 *communications* 8: 1-13
- 641 Kodama M, Kodama T, Newberg JY, Katayama H, Kobayashi M, Hanash SM, Yoshihara K, Wei Z, Tien JC,  
642 Rangel R (2017) In vivo loss-of-function screens identify KPNB1 as a new druggable oncogene in epithelial ovarian  
643 cancer. *Proceedings of the National Academy of Sciences* 114: E7301-E7310
- 644 Kosyna FK, Nagel M, Kluxen L, Kraushaar K, Depping R (2015) The importin  $\alpha/\beta$ -specific inhibitor Ivermectin  
645 affects HIF-dependent hypoxia response pathways. *Biological chemistry* 396: 1357-1367
- 646 Kumar A, Coleman I, Morrissey C, Zhang X, True LD, Gulati R, Etzioni R, Bolouri H, Montgomery B, White T  
647 (2016) Substantial interindividual and limited intraindividual genomic diversity among tumors from men with  
648 metastatic prostate cancer. *Nature medicine* 22: 369-378
- 649 Laing R, Gillan V, Devaney E (2017) Ivermectin—old drug, new tricks? *Trends in parasitology* 33: 463-472
- 650 Li J, Xu C, Lee HJ, Ren S, Zi X, Zhang Z, Wang H, Yu Y, Yang C, Gao X (2020) A genomic and epigenomic atlas  
651 of prostate cancer in Asian populations. *Nature* 580: 93-99
- 652 Li L, Karanika S, Yang G, Wang J, Park S, Broom BM, Manyam GC, Wu W, Luo Y, Basourakos S (2017)  
653 Androgen receptor inhibitor–induced “BRCAness” and PARP inhibition are synthetically lethal for  
654 castration-resistant prostate cancer. *Science signaling* 10
- 655 Lim LE, Vilchèze C, Ng C, Jacobs WR, Ramón-García S, Thompson CJ (2013) Anthelmintic avermectins kill  
656 Mycobacterium tuberculosis, including multidrug-resistant clinical strains. *Antimicrobial agents and chemotherapy*  
657 57: 1040-1046
- 658 Lv S, Ji L, Chen B, Liu S, Lei C, Liu X, Qi X, Wang Y, Lai-Han Leung E, Wang H *et al* (2018) Histone  
659 methyltransferase KMT2D sustains prostate carcinogenesis and metastasis via epigenetically activating LIFR and  
660 KLF4. *Oncogene* 37: 1354-1368
- 661 Lv S, Song Q, Chen G, Cheng E, Chen W, Cole R, Wu Z, Pascal LE, Wang K, Wipf P (2020) Regulation and  
662 targeting of androgen receptor nuclear localization in castration-resistant prostate cancer. *The Journal of Clinical*  
663 *Investigation* 131: e141335.
- 664 Lv S, Wen H, Shan X, Li J, Wu Y, Yu X, Huang W, Wei Q (2019) Loss of KMT2D induces prostate cancer  
665 ROS-mediated DNA damage by suppressing the enhancer activity and DNA binding of antioxidant transcription  
666 factor FOXO3. *Epigenetics* 14: 1194-1208
- 667 Molina DM, Jafari R, Ignatushchenko M, Seki T, Larsson EA, Dan C, Sreekumar L, Cao Y, Nordlund P (2013)  
668 Monitoring drug target engagement in cells and tissues using the cellular thermal shift assay. *Science* 341: 84-87
- 669 Mootha VK, Lindgren CM, Eriksson K-F, Subramanian A, Sihag S, Lehar J, Puigserver P, Carlsson E, Ridderstråle  
670 M, Laurila E (2003) PGC-1 $\alpha$ -responsive genes involved in oxidative phosphorylation are coordinately  
671 downregulated in human diabetes. *Nature genetics* 34: 267-273
- 672 Nappi L, Aguda AH, Al Nakouzi N, Lejl-Garolla B, Beraldi E, Lallous N, Thi M, Moore S, Fazli L, Battsogt D  
673 (2020) Ivermectin inhibits HSP27 and potentiates efficacy of oncogene targeting in tumor models. *The Journal of*  
674 *clinical investigation* 130: 699-714

- 675 Pettengill MA, Lam VW, Ollawa I, Marques-da-Silva C, Ojcius DM (2012) Ivermectin inhibits growth of  
676 *Chlamydia trachomatis* in epithelial cells. *PLoS One* 7: e48456
- 677 Rathkopf DE, Smith MR, De Bono JS, Logothetis CJ, Shore ND, De Souza P, Fizazi K, Mulders PF, Mainwaring P,  
678 Hainsworth JD (2014) Updated interim efficacy analysis and long-term safety of abiraterone acetate in metastatic  
679 castration-resistant prostate cancer patients without prior chemotherapy (COU-AA-302). *European urology* 66:  
680 815-825
- 681 Saei AA, Gullberg H, Sabatier P, Beusch CM, Johansson K, Lundgren B, Arvidsson PI, Arnér ES, Zubarev RA  
682 (2020) Comprehensive chemical proteomics for target deconvolution of the redox active drug auranofin. *Redox*  
683 *biology* 32: 101491
- 684 Savitski MM, Reinhard FB, Franken H, Werner T, Savitski MF, Eberhard D, Molina DM, Jafari R, Dovega RB,  
685 Klaeger S (2014) Tracking cancer drugs in living cells by thermal profiling of the proteome. *Science* 346  
686 Seluanov A, Mao Z, Gorbunova V (2010) Analysis of DNA double-strand break (DSB) repair in mammalian cells.  
687 *JoVE (Journal of Visualized Experiments)*: e2002
- 688 Sharmeen S, Skrtic M, Sukhai MA, Hurren R, Gronda M, Wang X, Fonseca SB, Sun H, Wood TE, Ward R (2010)  
689 The antiparasitic agent ivermectin induces chloride-dependent membrane hyperpolarization and cell death in  
690 leukemia cells. *Blood, The Journal of the American Society of Hematology* 116: 3593-3603
- 691 Siegel RL, Miller KD, Fuchs HE, Jemal A (2021) Cancer Statistics, 2021. *CA: a Cancer Journal for Clinicians* 71:  
692 7-33
- 693 Simon JM, Giresi PG, Davis IJ, Lieb JD (2012a) Using formaldehyde-assisted isolation of regulatory elements  
694 (FAIRE) to isolate active regulatory DNA. *Nature protocols* 7: 256
- 695 Simon JM, Giresi PG, Davis IJ, Lieb JD (2012b) Using formaldehyde-assisted isolation of regulatory elements  
696 (FAIRE) to isolate active regulatory DNA. *Nat Protoc* 7: 256-267
- 697 Tang M, Hu X, Wang Y, Yao X, Zhang W, Yu C, Cheng F, Li J, Fang Q (2020) Ivermectin, a potential anticancer  
698 drug derived from an antiparasitic drug. *Pharmacological Research*: 105207
- 699 Thompson TC, Li L, Broom BM (2017) Combining enzalutamide with PARP inhibitors: Pharmaceutically induced  
700 BRCAness. *Oncotarget* 8: 93315
- 701 Wang L, Xu M, Kao C-Y, Tsai SY, Tsai M-J (2020) Small molecule JQ1 promotes prostate cancer invasion via  
702 BET-independent inactivation of FOXA1. *The Journal of clinical investigation* 130
- 703 Zhang C, Wang L, Wu D, Chen H, Chen Z, Thomas-Ahner JM, Zynger DL, Eeckhoutte J, Yu J, Luo J (2011)  
704 Definition of a FoxA1 Cistrome that is crucial for G1 to S-phase cell-cycle transit in castration-resistant prostate  
705 cancer. *Cancer research* 71: 6738-6748

706

## 707 **Figure Legends**

708 **Figure 1. Ivermectin inhibited prostate cancer cell viability.** Cell viability was measured by  
709 the MTT assay in AR positive cells (LNCaP, C4-2, and 22RV1, **A**), AR negative cells (DU145  
710 and PC-3, **B**), and prostate primary cells from benign prostatic hyperplasia patients (**C**) treated  
711 with the indicated concentrations of ivermectin for either 24 h, 48 h, or 72 h.

712

713 **Figure 2. Ivermectin led to G0/G1 arrest, apoptosis, and DNA damage in prostate cancer.**

714 **(A)** The ivermectin arrest cell cycle at G0/G1 was measured by flow cytometry. LNCaP, C4-2,  
715 and 22RV1 cells were treated with ivermectin at 4  $\mu$ M, 8  $\mu$ M, and 12  $\mu$ M for 48 h. **(B)**  
716 Ivermectin induced cell apoptosis detected by PI/Annexin V staining. Cells were treated as in A.  
717 The PI+/Annexin V+ and PI-/Annexin V+ cells were calculated as apoptotic cells. **(C)** Western  
718 blot analysis of PARP and cleaved-Caspase3 (c-Caspase3) in cells treated with ivermectin for 48  
719 h. **(D)** Ivermectin increased DNA damage. DNA fragments were shown as comet images in  
720 alkaline gel electrophoresis. The tail moment was used to quantify the DNA damage in the  
721 treatment of ivermectin for 48 h. **(E)** Western blot analysis of  $\gamma$ H2A.X in cells treated with the  
722 ivermectin for 48 h. **(F)** Tumor volume of 22RV1 xenografts after castration treated with vehicle  
723 (con) or ivermectin (10 mg/kg, n = 5 for each group). **(G)** Representative images of Ki67,  
724  $\gamma$ H2A.X and PSA immunostaining, in 22RV1 tumors treated with vehicle or ivermectin.

725

726 **Figure 3. Ivermectin inhibited the FL-AR and AR-V7 signaling activity.** **(A)** Western blot

727 analysis of AR and PSA in LNCaP and C4-2 cells treated with ivermectin for 48 h. **(B)**  
728 RT-qPCR analysis of AR target genes (*KLK3*, *TMPRSS2*, and *NKX3-1*) in LNCaP and C4-2 cells  
729 treated with ivermectin for 48 h. **(C)** Western blot analysis of FL-AR, ARVs, PSA, and UBE2C  
730 in ivermectin-treated 22RV1 cells at 48 h. **(D)** RT-qPCR analysis of *KLK3* and ARV target  
731 genes (*UBE2C* and *CDC20*) in 22RV1 cells treated with ivermectin for 48 h. **(E)** Western blot  
732 analysis of FL-AR, ARVs, PSA, PARP, and  $\gamma$ H2A.X in the other two ARV positive cells lines,  
733 LN95 and VCaP, treated with ivermectin for 48 h. **(F)** Western blot analysis of AR, PSA, PARP,  
734 and  $\gamma$ H2A.X in LNCaP and C4-2 cells after the implementation of 4  $\mu$ M and 8  $\mu$ M of ivermectin  
735 with or without 1 nM R1881. **(G)** Ivermectin inhibited the cell cycle at G0/G1 in the presence of  
736 R1881. LNCaP and C4-2 cells were treated with ivermectin at 4 and 8  $\mu$ M for 48 h in the  
737 absence or presence of 1 nM R1881. **(H)** Cell viability was measured by the MTT assay. LNCaP

738 and C4-2 cells were treated with indicated concentrations of ivermectin for 48 h with or without  
739 5  $\mu$ M and 10  $\mu$ M enzalutamide for 48 h.

740

741 **Figure 4. Ivermectin repressed E2F targets.** (A) Normalized-enrichment scores (NES) of  
742 GSEA hallmark gene sets for all four comparison in C4-2 and 22RV1 cells. Significant gene  
743 sets comparing ivermectin versus vehicle (P value < 0.05) are labeled. (B) Venn diagram  
744 indicating the number of DEGs between C4-2 and 22RV1 cells. (C-D) The GSEA of C4-2 and  
745 22RV1 concordant altered genes highlighted that hallmark E2F targets (C) and TRANSFAC  
746 E2F1 targets (D) were repressed by ivermectin. (E-F) The protein (E) and mRNA (F) expression  
747 of E2F1 decreased in C4-2 and 22RV1 cells treated with ivermectin. (G) Western blots showing  
748 thermostable E2F1 following indicated heat shocks in the presence (+) or absence (-) of 50  $\mu$ M  
749 ivermectin in C4-2 cells.

750

751 **Figure 5. Ivermectin interacted with FOXA1 to block pioneer factor activity.** (A) GSEA  
752 showed that genes induced by FOXA1 were inhibited by ivermectin in C4-2 cells. (B) RT-qPCR  
753 analysis of FOXA1 induced genes (*CDKN3*, *CDCA2*, and *CAMKK2*) and FOXA1 repressed  
754 EMT associated-genes (*MET*, *MMP7*, and *SOX9*) in C4-2 cells treated with ivermectin for 48 h.  
755 (C) Western blot analysis of FOXA1 and N-cadherin in LNCaP and C4-2 cells treated with  
756 ivermectin for 48 h. (D) ChIP-qPCR analysis for FOXA1 or AR occupancy, and FAIRE-qPCR  
757 analysis of chromatin accessibility at a target regulated by AR and FOXA1 (*KLK3* and *NKX3-1*)  
758 in C4-2 cells treated with ivermectin. (E) ChIP-qPCR analysis for FOXA1 and FAIRE-PCR  
759 analysis of chromatin accessibility at a target regulated by FOXA1 (*E2F1* and *MET*) in C4-2  
760 cells treated with ivermectin. (F) FOXA1 knockdown impaired the ivermectin-repressed  
761 expression of *KLK3* and *E2F1* genes. mRNA levels were measured 48 h after the  
762 implementation of the ivermectin treatment and siRNA transfection by RT-qPCR in C4-2 cells.  
763 (G-H) Western blots showing thermostable FOXA1 and AR following indicated heat shocks in

764 the presence (+) or absence (-) of 50  $\mu$ M ivermectin in LNCaP (**G**) and C4-2 (**H**) cells. (**I**)  
765 Western blots showing thermostable FOXA1 following indicated heat shocks in the presence (+)  
766 or absence (-) of 50  $\mu$ M ivermectin in 22RV1 cells. (**J**) GSEA showed the inactivation of  
767 FOXA1 induced genes in 22RV1 cells after the ivermectin treatment. (**K**) RT-qPCR analysis of  
768 FL-AR and ARv7 in 22RV1 cells treated with ivermectin for 48 h. (**L**) ChIP-qPCR analysis for  
769 FOXA1 and FAIRE-qPCR analysis of chromatin accessibility at KLK3 and E2F1 in 22RV1  
770 cells treated with ivermectin.

771  
772 **Figure 6. Ivermectin bound to Ku70/Ku80.** (**A**) Scatter plot of melting point difference  
773 calculated from the ivermectin versus DMSO controls in living 22RV1 cells. Blue circles  
774 represent significant melting temperature differences and red circles show all remaining proteins.  
775 (**B**) KEGG and GO pathways by KOBAS showed the enrichment pathway of the proteins with  
776 the melting temperature difference ( $\Delta T_m$ ) more than  $\pm 3$  °C. (**C**) Melting curves for Ku70/Ku80  
777 generated from mass spectrum in 22RV1 cells. (**D-E**) Western blots showing thermostable  
778 Ku70/Ku80 following indicated heat shocks in the presence (+) or absence (-) of 50  $\mu$ M  
779 ivermectin in LNCaP (**D**) and C4-2 (**E**) cells.

780  
781 **Figure 7. Ivermectin inhibited DSBs repair activity.** (**A**) GSEA showed that genes associated  
782 DNA damage repair were inhibited by ivermectin in C4-2 and 22RV1 cells. (**B-C**) Western blot  
783 analysis Ku70, Ku80, BRCA1, and Rad51 in whole cell lysate or Ku70, Ku80, and  $\gamma$ H2A.X in  
784 nuclear and cytoplasmic fractions of C4-2 (**B**) and 22RV1 (**C**) cells. Lamin B and GAPDH were  
785 probed as nuclear and cytoplasmic loading controls, respectively. (**D-E**) The HR and NHEJ  
786 repair efficiencies after the ivermectin treatment were analyzed by flow cytometry using reporter  
787 constructs digested in vitro with I-SceI endonuclease, and transfected into C4-2 (**D**) and 22RV1  
788 (**E**) cells as linear DNA. DS-Red was used for transfection control. Repair rate was normalized  
789 to DS-Red.

790

791 **Figure 8. A model for mechanisms of ivermectin inhibiting prostate cancer progression.** In

792 PCa, ivermectin could target FOXA1 and Ku70/Ku80 directly and simultaneously. The binding

793 of ivermectin and FOXA1 reduced the chromatin accessibility of AR signaling and E2F1,

794 leading to cell cycle arrest and inhibiting cell proliferation. The binding of ivermectin and

795 Ku70/Ku80 block the recruitment of Ku70/Ku80 to DSB sites. Cooperating with the

796 downregulation of AR regulated homologous recombination repair genes, BRCA1 and Rad51,

797 ivermectin increased intracellular DNA damage level and triggered synthetic lethality.

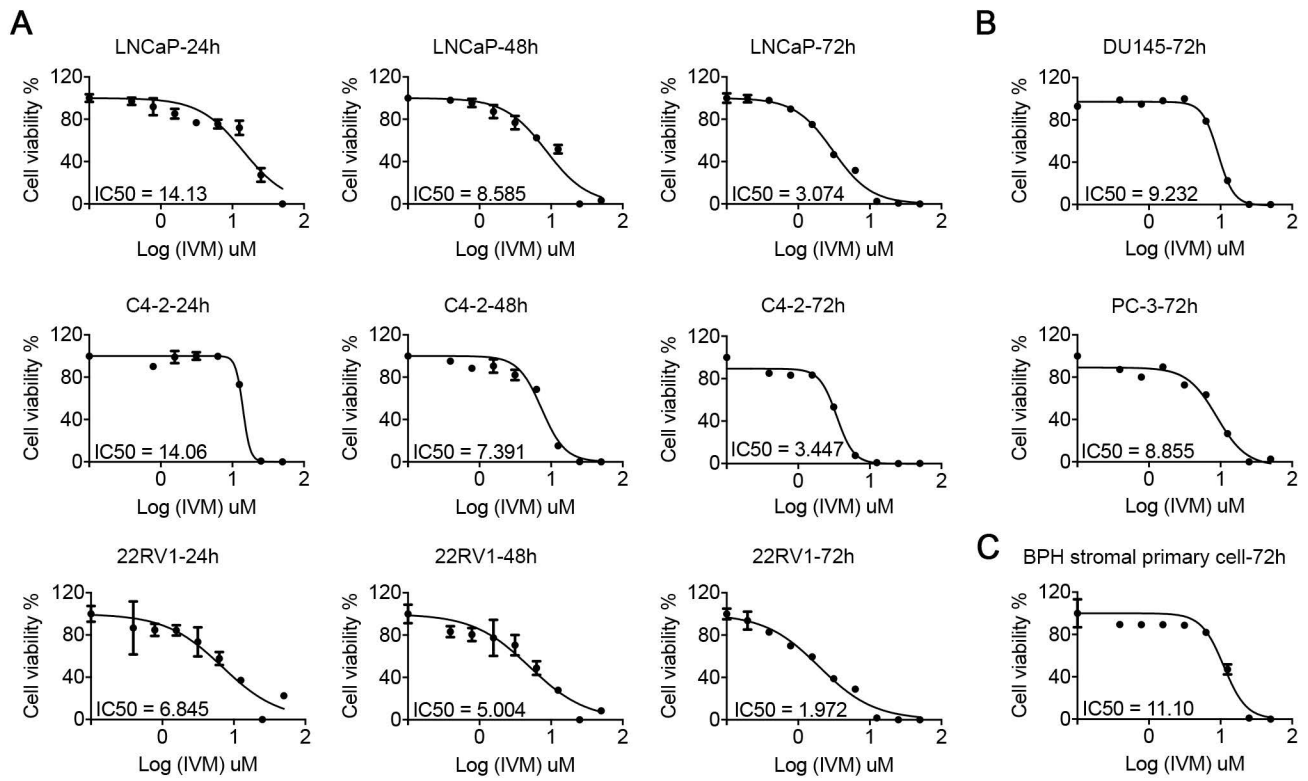

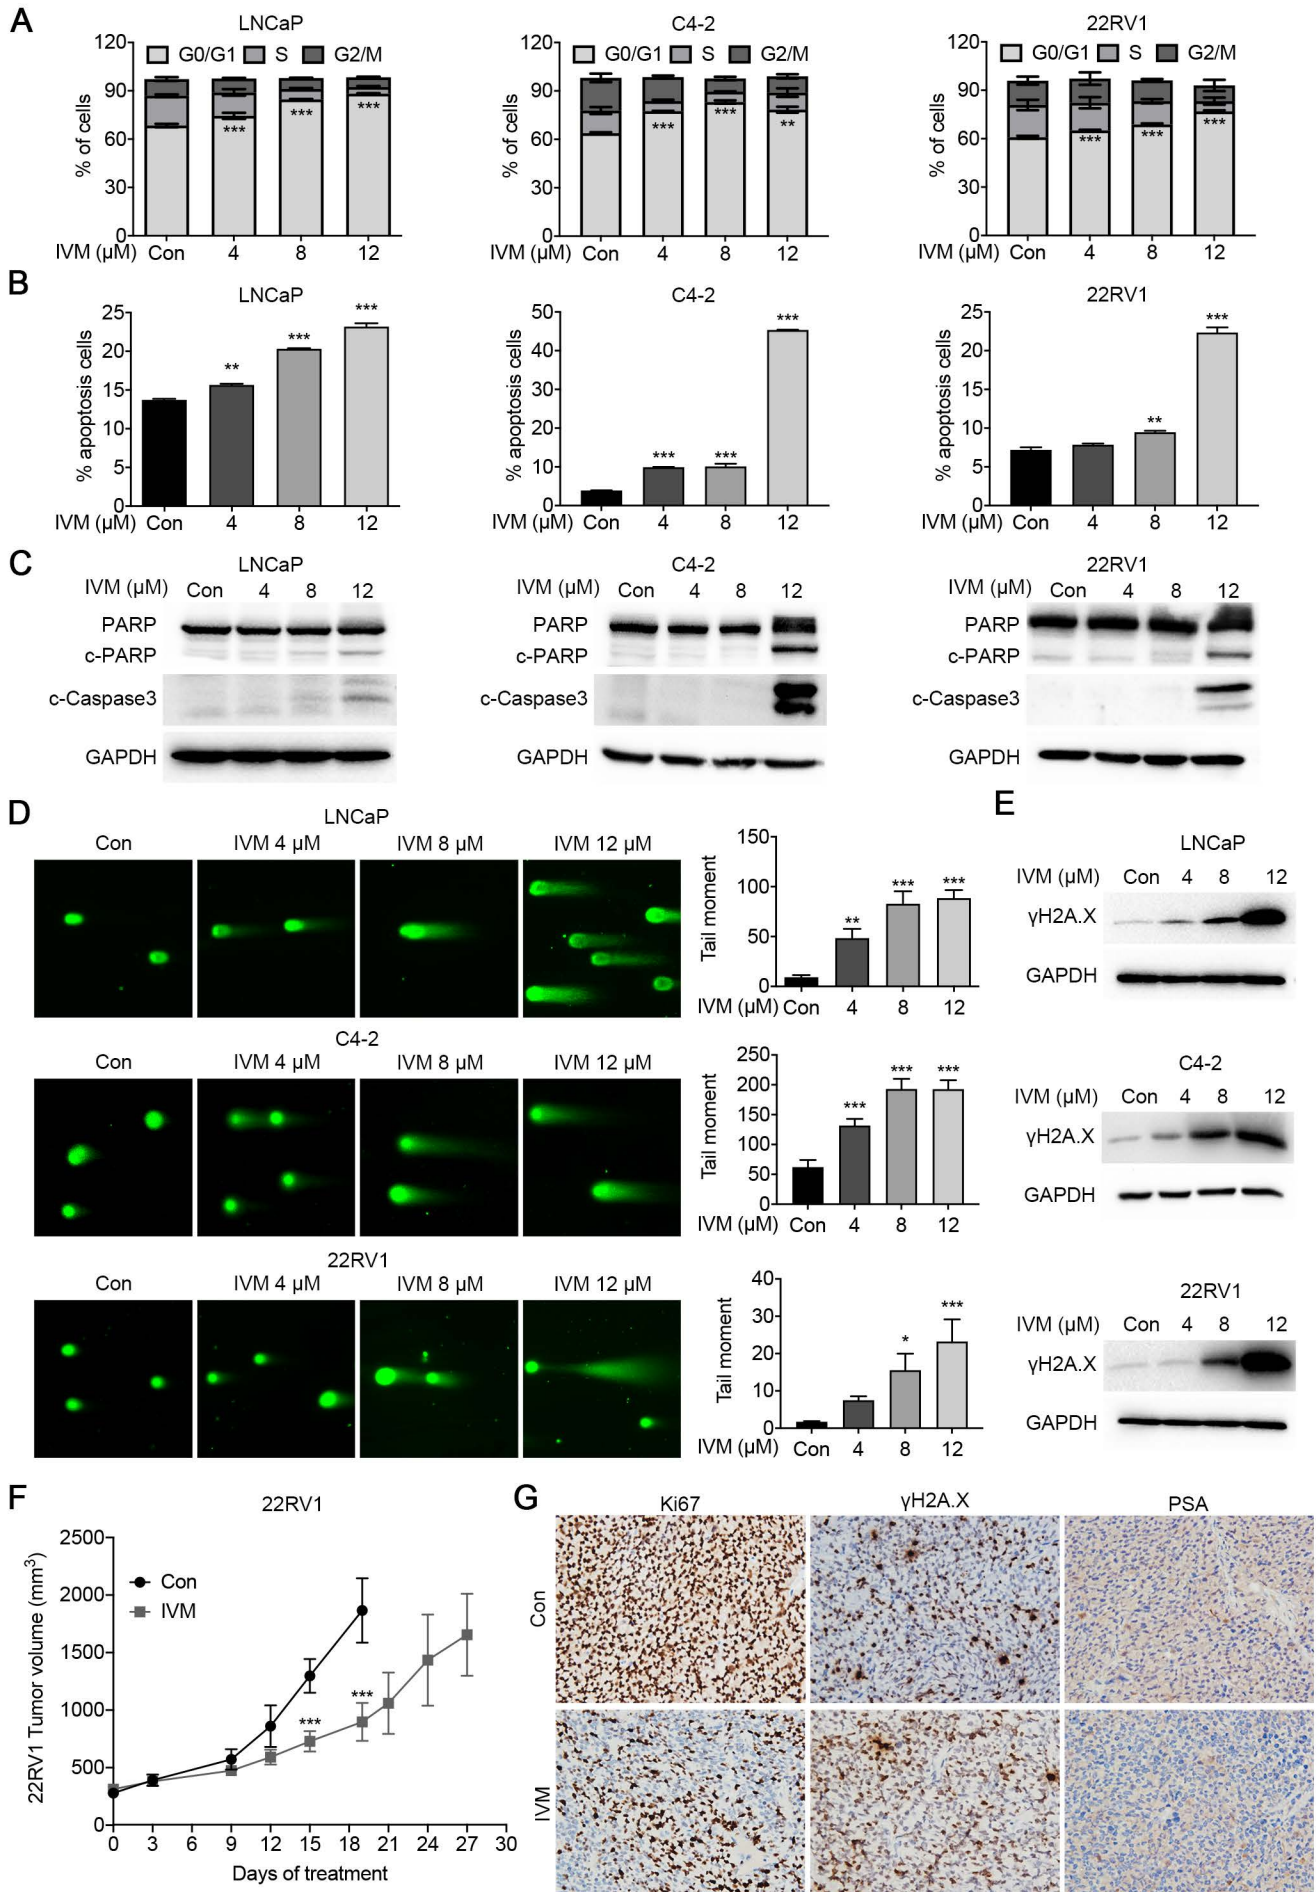



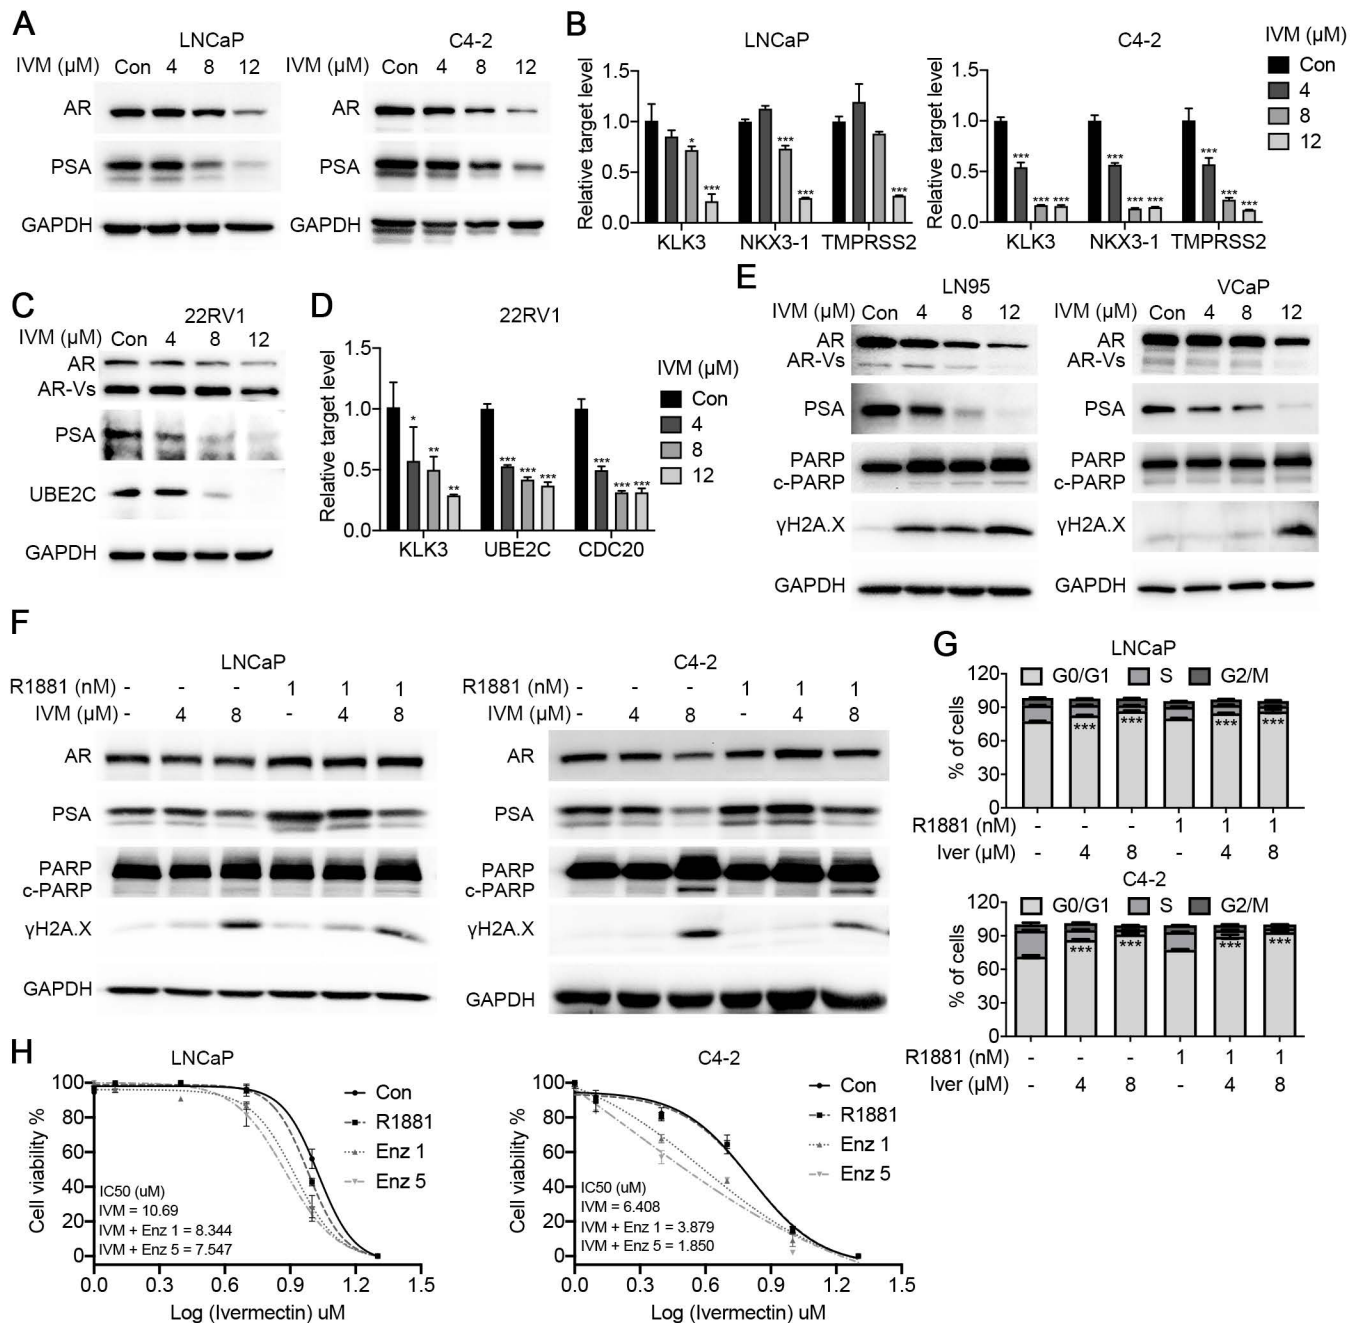

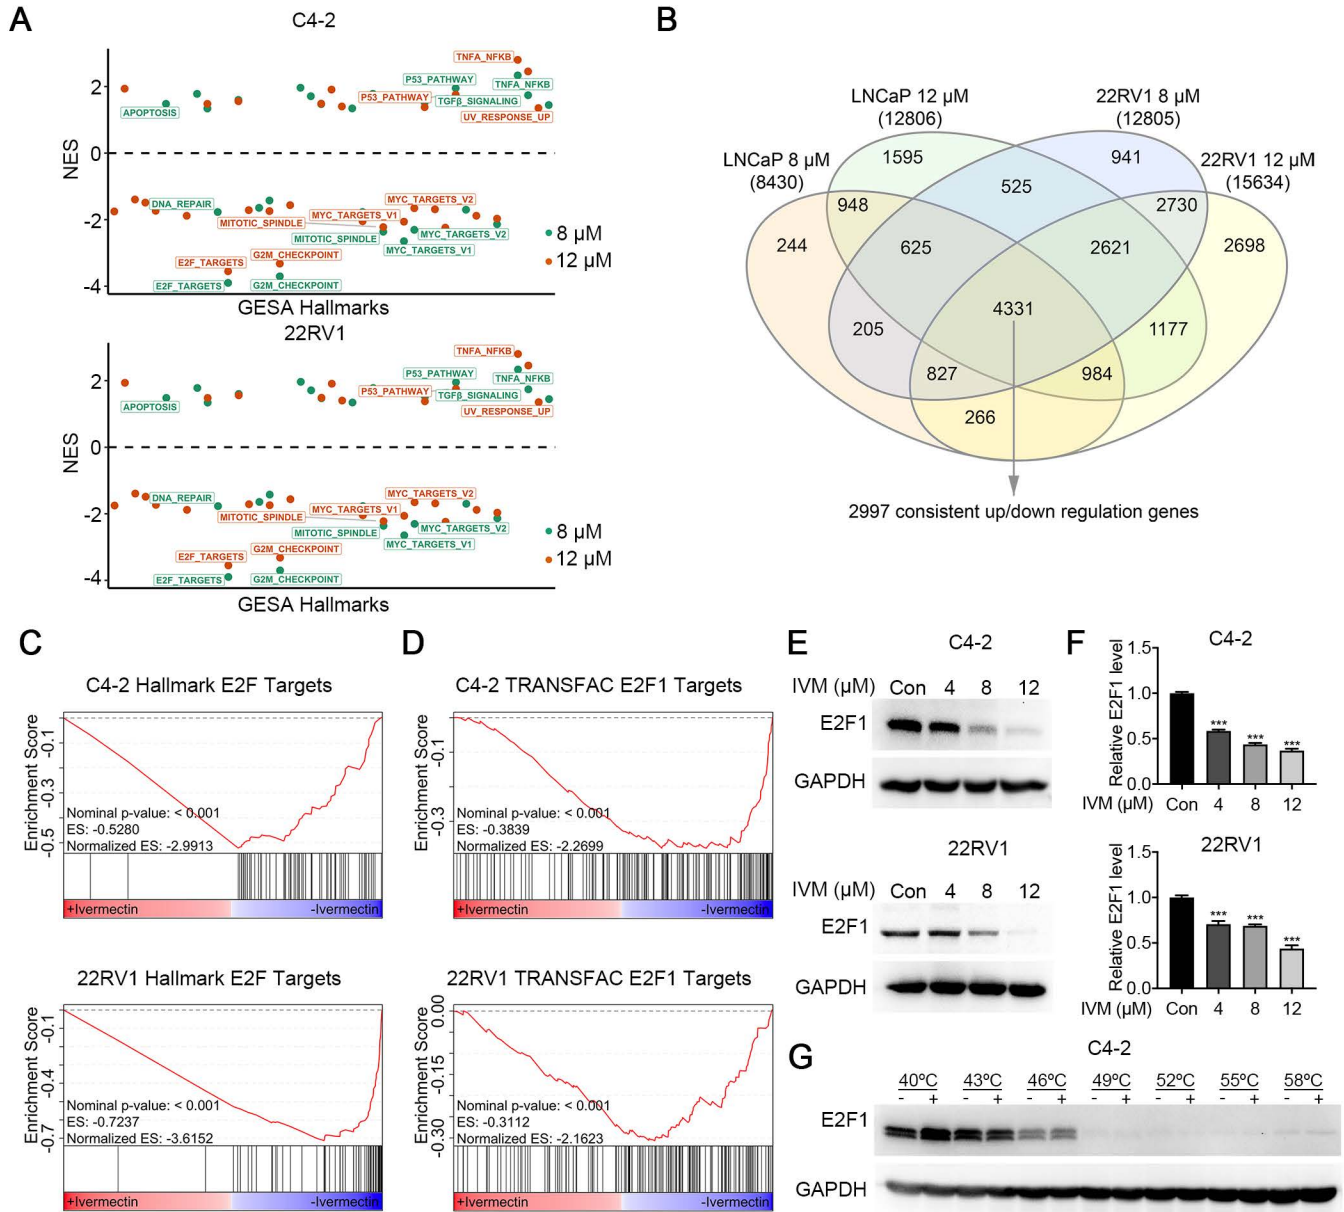

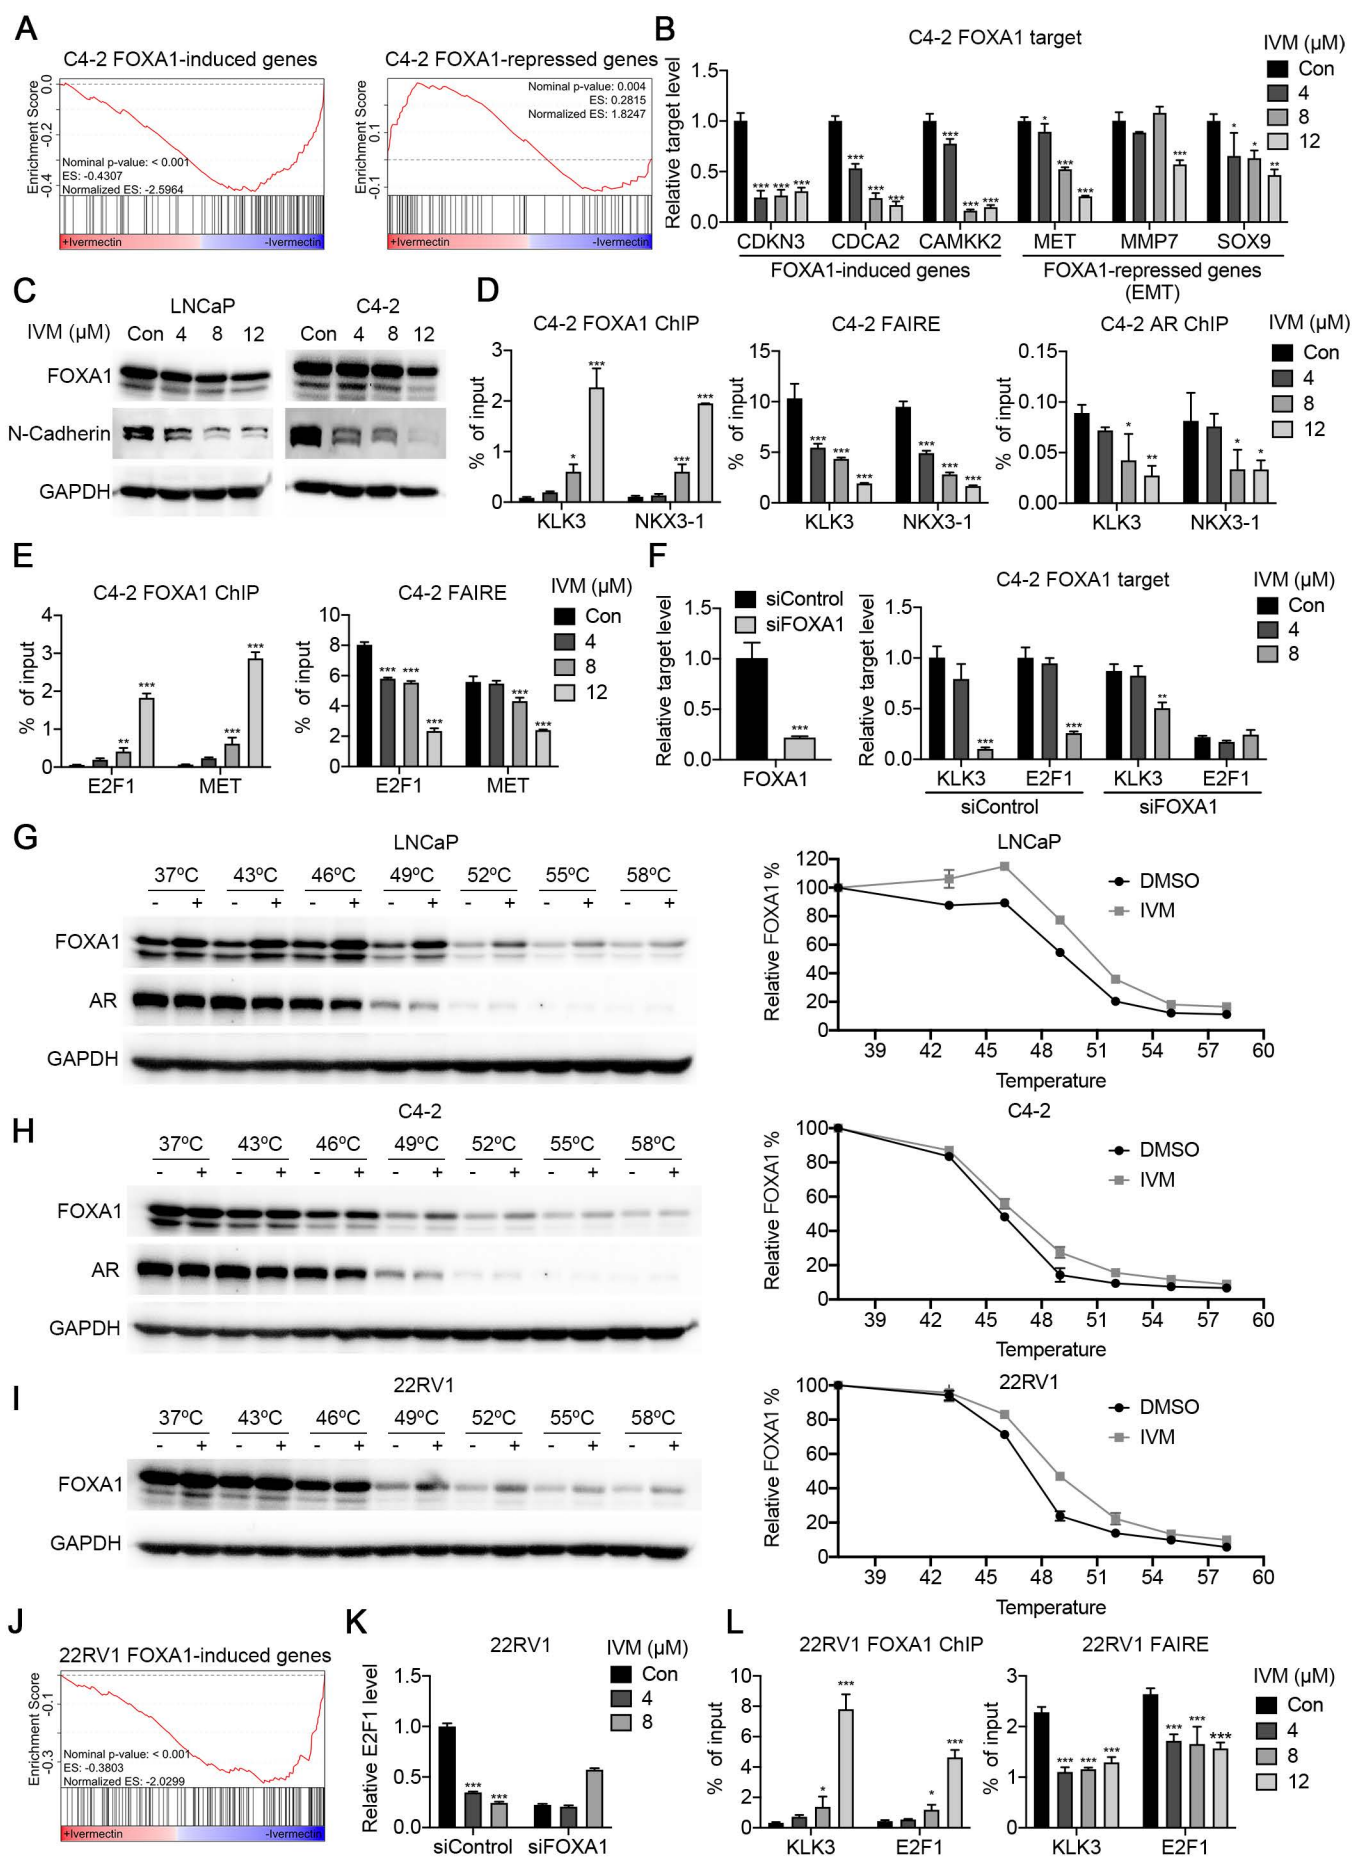

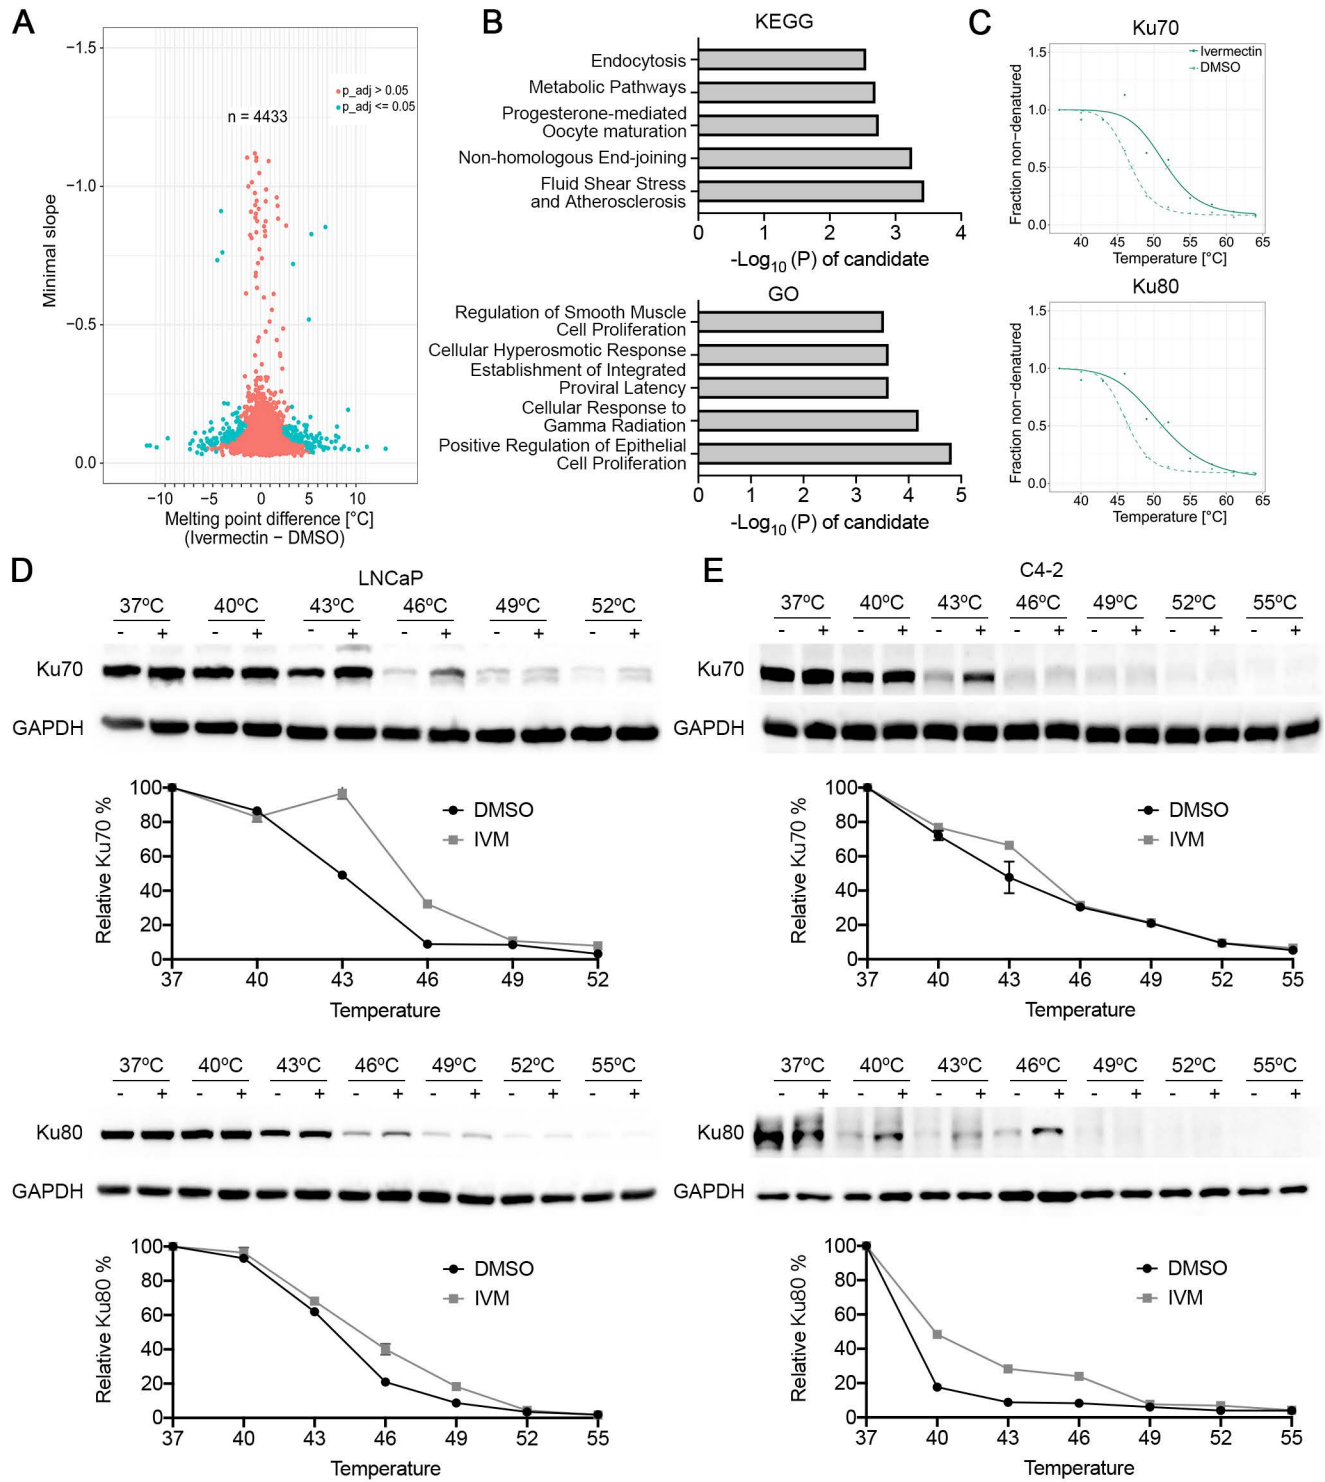

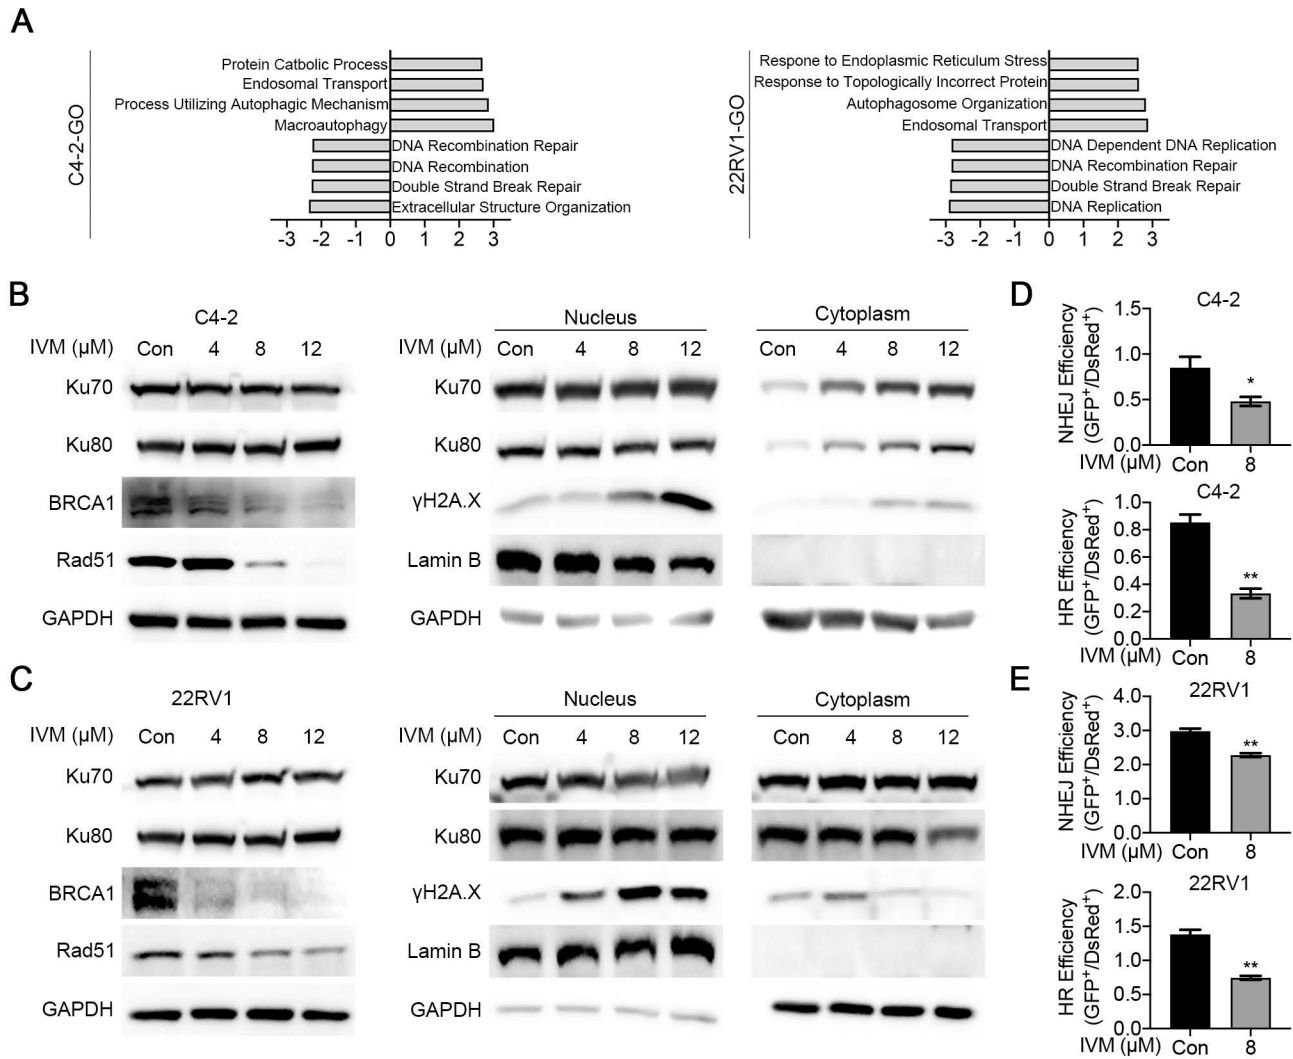

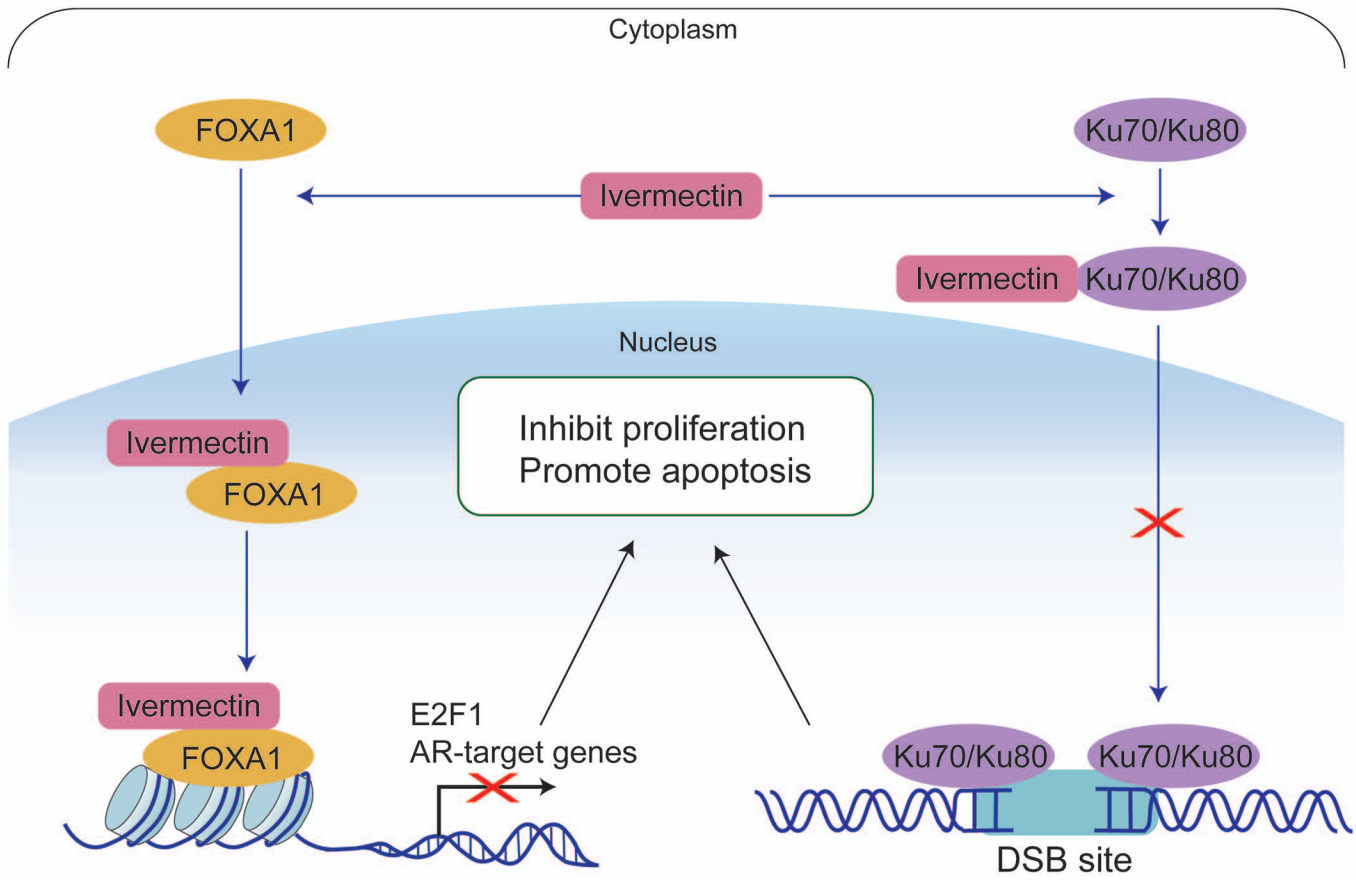

## Supplementary Materials for

### **Integrated analysis reveals FOXA1 and Ku70/Ku80 as direct targets of ivermectin in prostate cancer**

#### **Supplementary Figure Legends**

**Supplementary Figure 1.** (A) Flow cytometry profiling of cell cycle distribution in LNCaP, C4-2 and 22RV1 cells treated with indicated concentrations of ivermectin following PI staining. (B) Representative images of SA- $\beta$ -Galactosidase staining (blue-green) of LNCaP, C4-2 and 22RV1 cells.

**Supplementary Figure 2. Ivermectin weakly effected AR-negative DU145 cells.** (A) Ivermectin did not change the cell cycle distribution in DU145 cells treated at 4, 8 and 12  $\mu$ M for 48 hours. (B) Western blot analysis of PARP in cells treated with ivermectin for 48 hours. (C) Ivermectin increased DNA damage. DNA fragments were shown as comet images in alkaline gel electrophoresis (Dox: Doxorubicin was used as positive control). The tail moment was used to quantify the DNA damage in the treatment of ivermectin for 48 hours.

**Supplementary Figure 3.** The RT-qPCR verification of differential expression of AR signaling target genes identified by RNA-seq in C4-2 (A) and 22RV1 (B and C) cells.

**Supplementary Figure 4. Ivermectin increased the binding of FOXA1 on target sites but decreased the chromatin accessibility.** (A). The binding of FOXA1 on ARE+FKHD sites or FKHD only sites by ChIP-seq in LNCaP cells. (B) ChIP-qPCR analysis for FOXA1 or AR occupancy, and FAIRE-qPCR analysis of chromatin accessibility at target regulated by AR and FOXA1 in C4-2 cells treated with ivermectin. (C) ChIP-qPCR analysis for FOXA1 and FAIRE-PCR analysis of chromatin accessibility at target regulated by FOXA1 in C4-2 cells treated with ivermectin.

**Supplementary Figure 5.** (A) Verification of TPP-TR by western blot in 22RV1 cells. (B) RT-qPCR analysis of BRCA1 and Rad51 in C4-2 and 22RV1 cells treated with ivermectin for 48 h. (C) Western blot analysis of Ku80, Rad51 and PARP and in C4-2 cells after 12  $\mu$ M ivermectin treatment with or without 1 nM R1881. (D) Western blots showing thermostable Ku70 following indicated heat shocks in the presence (+) or absence (-) of 50  $\mu$ M ivermectin in DU145 cells. (E) Western blot analysis of Ku70, Rad51,  $\gamma$ H2A.X and PARP in nuclear and cytoplasmic fractions of DU145 cells. Lamin B and GAPDH was probed as nuclear and cytoplasmic loading control, respectively.



## Supplementary Fig. 1

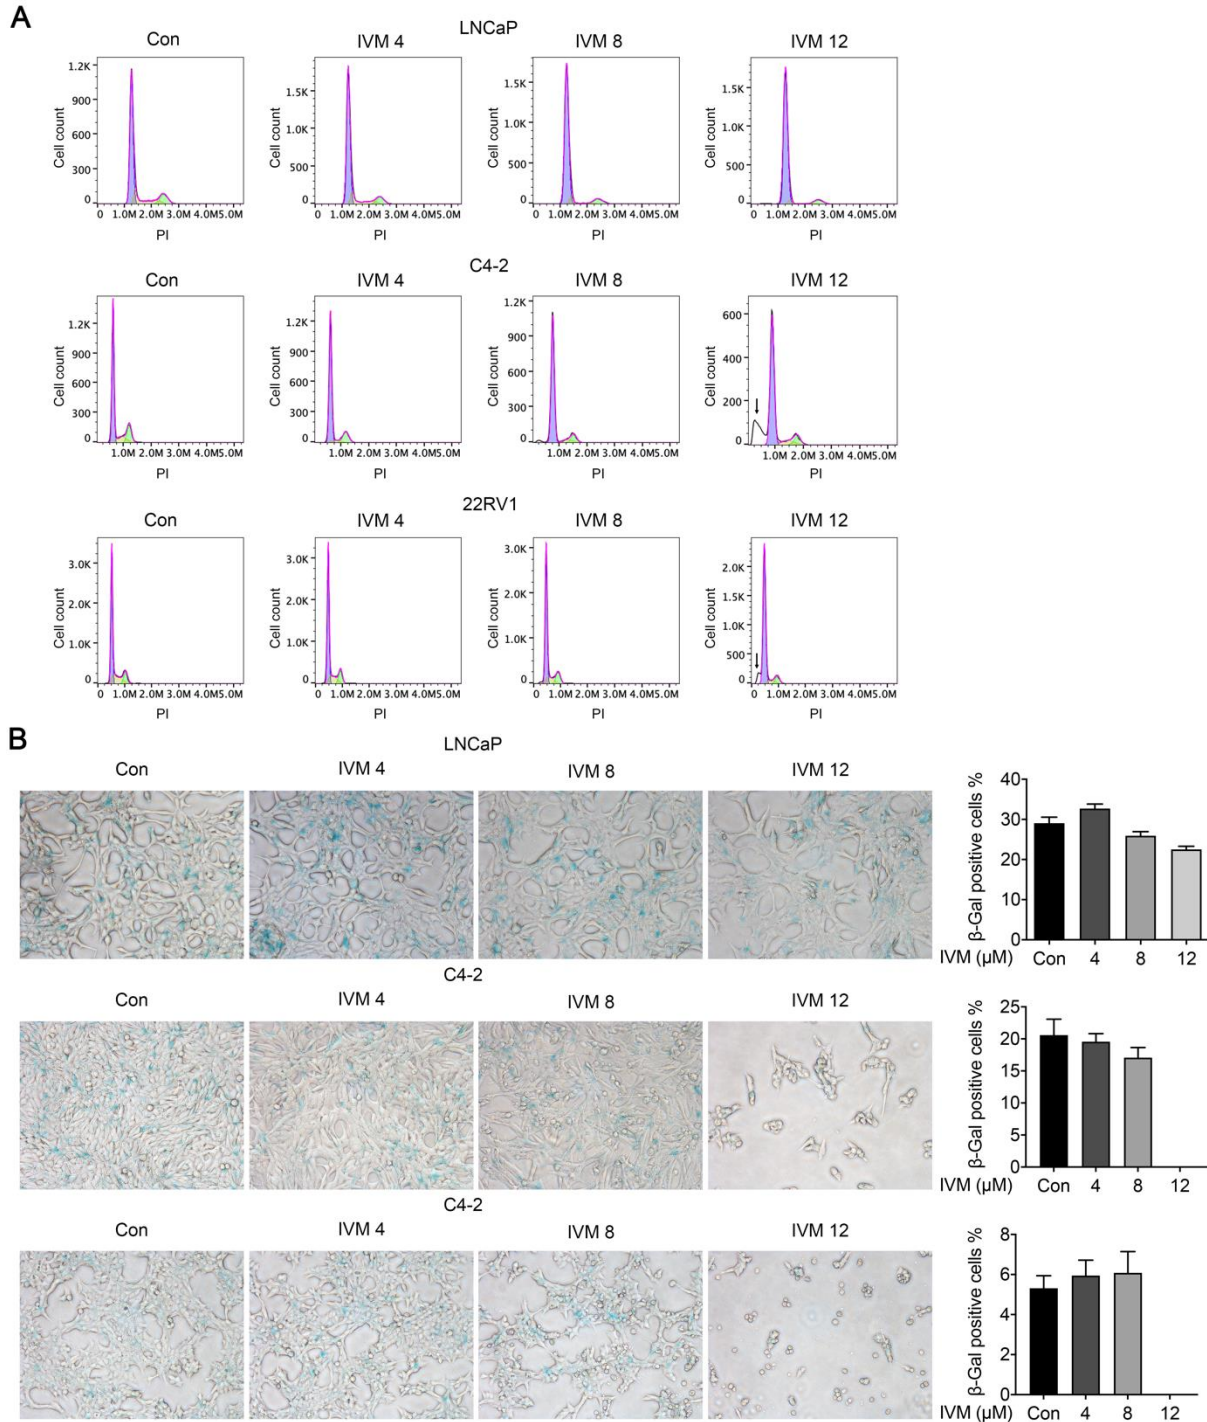

## Supplementary Fig. 2

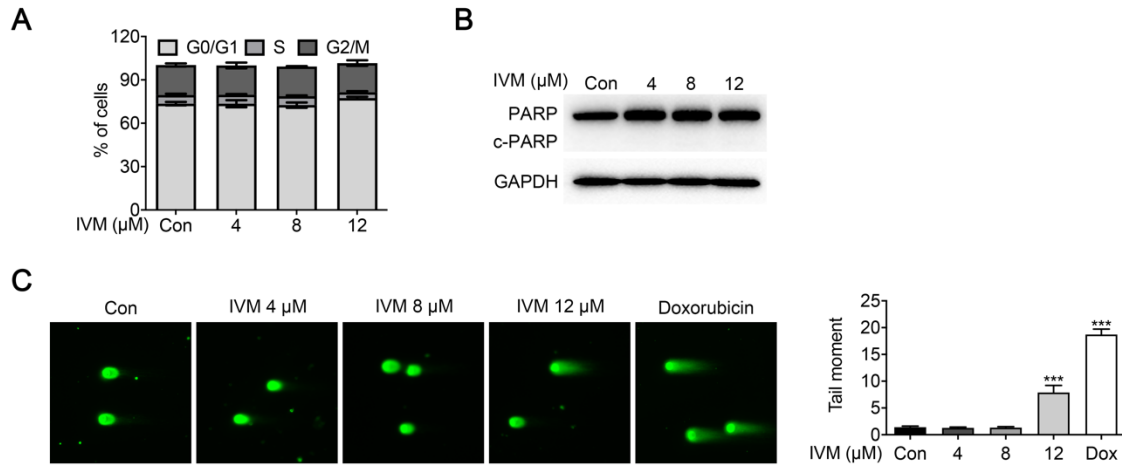

### Supplementary Fig. 3

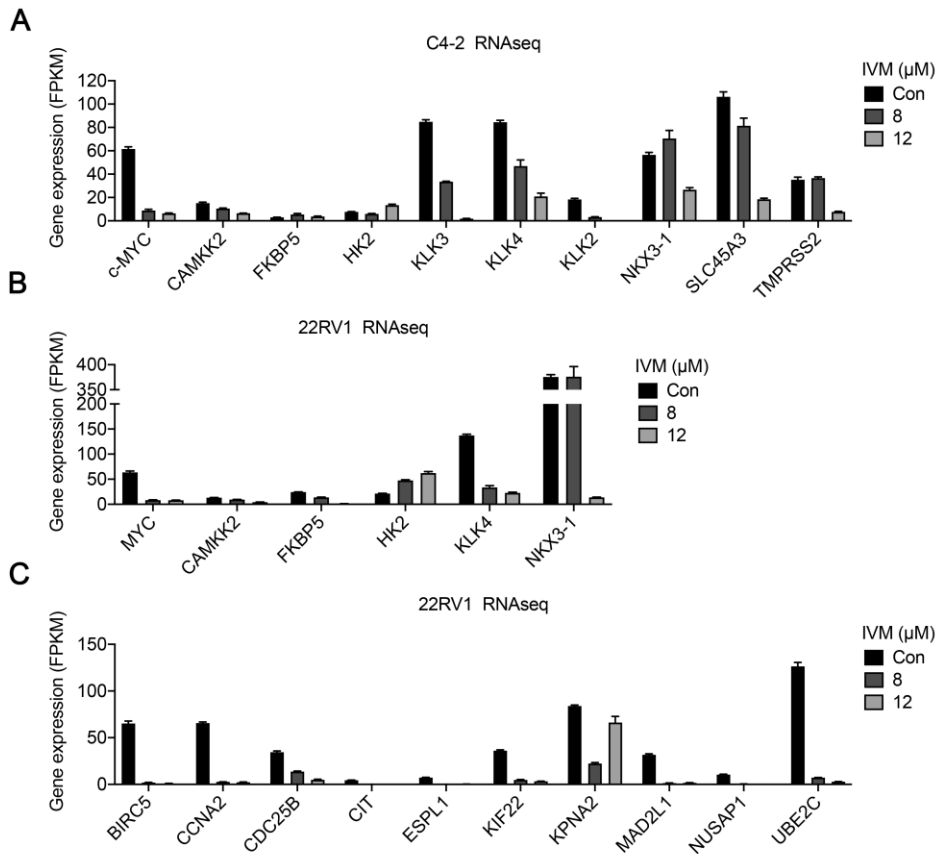

## Supplementary Fig. 4

A

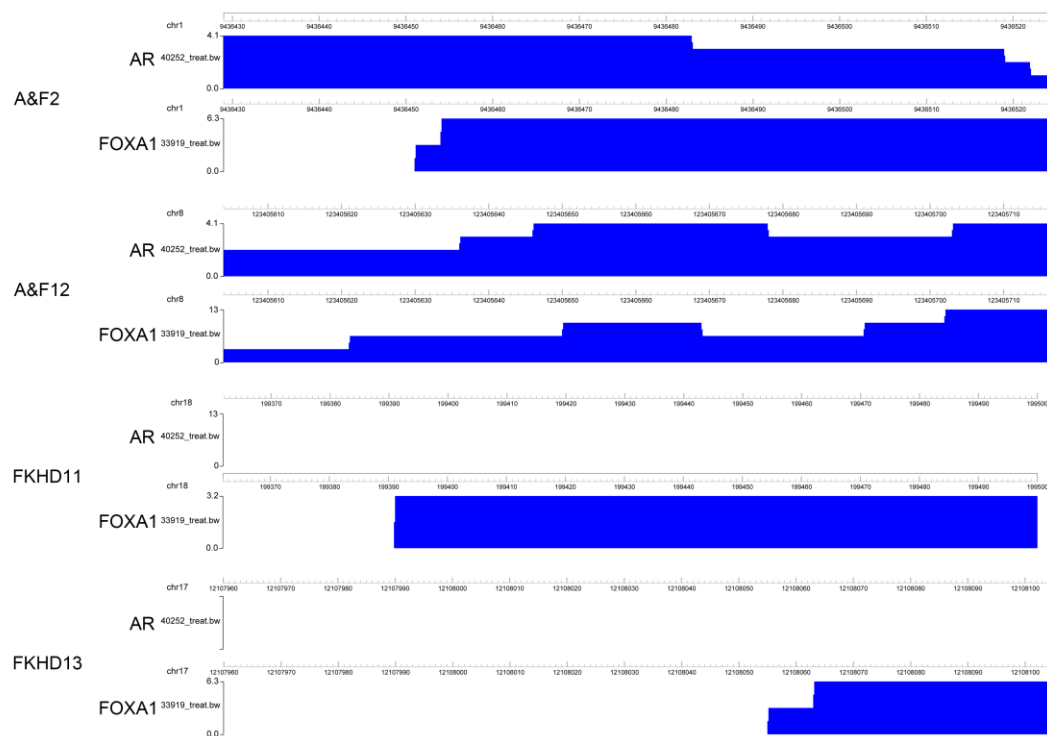

B

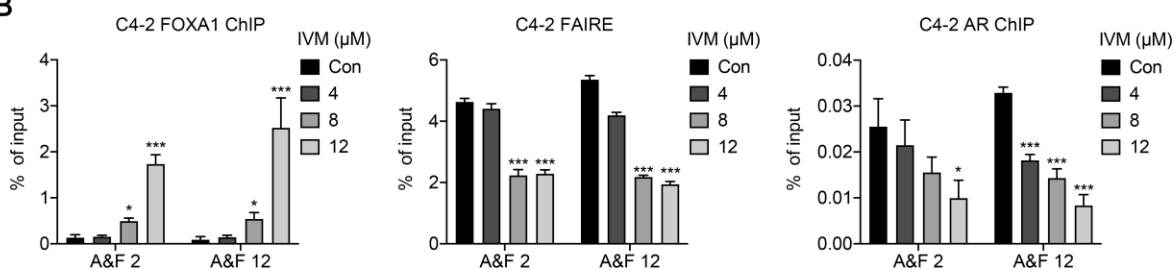

C

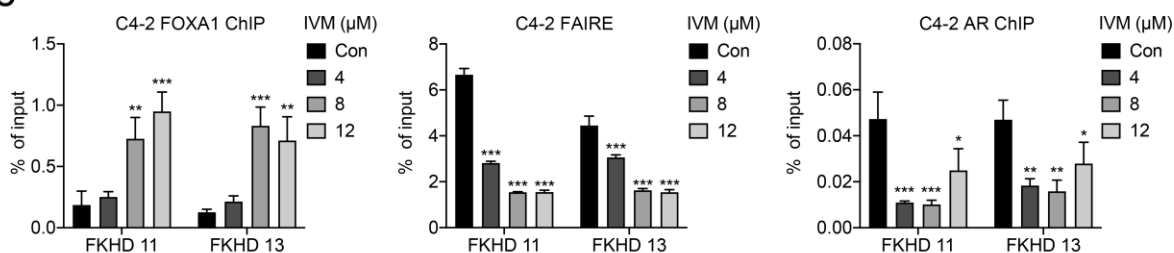

## Supplementary Fig. 5

**A**

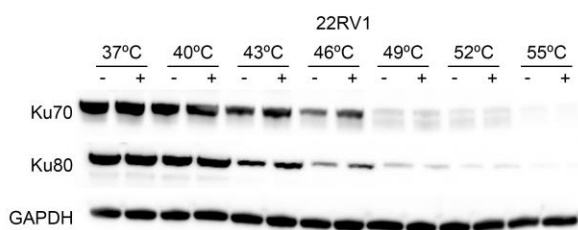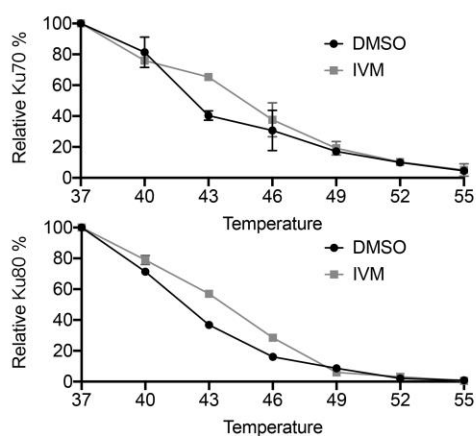

**B**

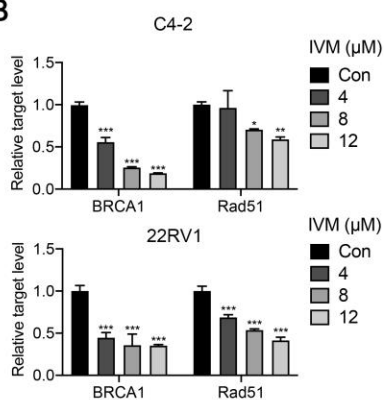

**C**

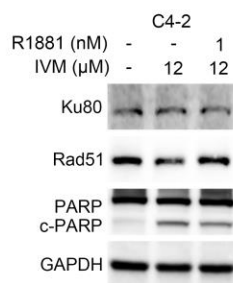

**D**

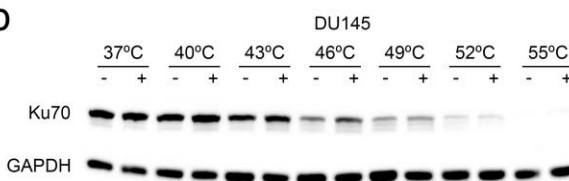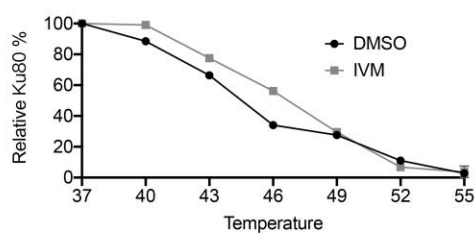

**E**

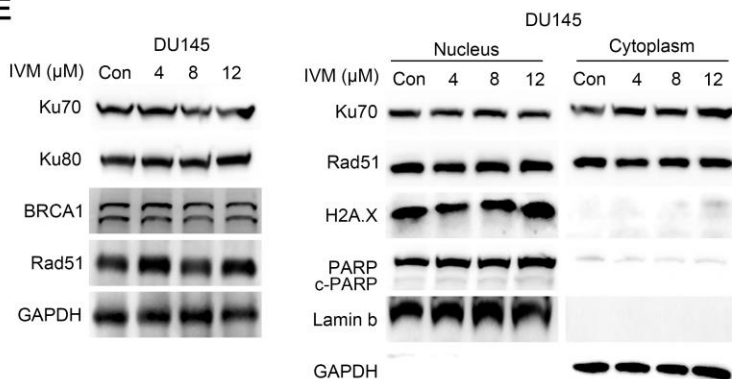

## Supplementary Table S1

### Primer sequence used in RT-qPCR analysis

| Name            | Forward Primer          | Reverse Primer          |
|-----------------|-------------------------|-------------------------|
| KLK3            | CAGGTGTAGACCAGAGTGTTTC  | CTGTGTCCTCAGAGAAATTGAGT |
| NKX3-1          | TCTGACAGGTGAATTGGATGG   | GATTGGAGCAGGGTTTGTATG   |
| TMPRSS2         | TGCTCCAACCTCTGGGATAGA   | GGATGAAGTTTGGTCCGTAGAG  |
| UBE2C           | AAAGTGGTCTGCCCTGTATG    | GGGACTATCAATGTTGGGTTCT  |
| CDC20           | AAGACCTGCCGTTACATTCC    | ACATTCCCAGAACTCCAATCC   |
| GAPDH           | CTCCTCACAGTTGCCATGTA    | GTTGAGCACAGGGTACTTTATTG |
| BRCA1           | CAGTCGGGAAACAAGCATAGA   | GCACATTCTCTTCTGCATTTT   |
| RAD51           | GGCAGTGATGTCCTGGATAATG  | CGGTGGCACTGTCTACAATAAG  |
| E2F1            | CTGAGGCCTGGGTGATTTATT   | TCTCCCATCTCATATCCATCCT  |
| CDKN3           | TCGGTTTATGTGCTCTTCCA    | TTTTGACAGTTCCTCTGG      |
| CDCA2           | GACAGAGCATGTGCAGTTGAA   | TGAGCTCTGAAAGGGGAAGA    |
| CAMKK2          | TCTCACACGTCTCCATCAC     | GCCCTTTCCAATTTATCCT     |
| MET             | CCGTGAAGATCCCATTTGTCTAT | GACCATTCTCGGGACACTAAC   |
| MMP7            | GGAGGCATGAGTGAGCTACAG   | GGCCAAAGAATTTTGCATC     |
| SOX9            | AGTACCCGCACTTGACACAAC   | GTAATCCGGGTGGTCTTCT     |
| FOXA1           | GTATTCCAGACCCGTCCTAAAC  | CTGTTGACGGTTTGGTTTGTG   |
| KLK3-enhancer   | TCGATTGTCCTTGACAGTAAACA | TCTCAGATCCAGGCTTGCTT    |
| NKX3-1-enhancer | CTGGCAAAGAGCATCTAGGG    | GGCACTTCTGAGCAAACCT     |
| E2F1-enhancer   | GGGACACGGCCACATTGT      | TGGTCCCCAAGTCTTCCA      |
| MET-enhancer    | TGAGACACAGTGGATGTGTGA   | GATCTCCCTGGTTGTTGCAT    |
| A&F 2           | GGCTTCTTATCATGCCTGGA    | AAGAACAGACAGTACGGAGTGG  |
| A&F 12          | AGCATGTGTTTGCATGGGTA    | CACAGGGAAAGATCACTAAGACC |
| FKHD 11         | TTGCGAGTAAGCCAAAGTCA    | GCTGAAACAAGAAGGCCAAG    |
| FKHD 13         | TGCTGCTGGAGTTTTGAATG    | TTGGCAGTATTTATCGAGACCA  |
